# Supplementary material
Source: publisher figshare collection journal article supplement (https://acs.figshare.com/ndownloader/files/5737194)
Supplement: Supplementary file 1 [file 5737194]

## Supporting Information: Experimental Procedure and Spectral Data.

**General.** All reactions were carried out using standard Schlenk techniques. Preparative TLC was carried out using 20x 20 cm glass plates coated with silica gel 60 (1000-micron thickness) with fluorescent indicator (Analab). NMR spectra were obtained on a Bruker DRX-400.  $^{31}\text{P}$  NMR spectra were referenced to external 85 % phosphoric acid,  $^{13}\text{C}$  spectra to  $\text{CDCl}_3$ , and  $^1\text{H}$  spectra to tetramethylsilane. IR spectra were obtained on a Nicolet Impact 400D spectrometer with samples prepared as KBr disks. Elemental analyses were performed by Robertson Microlit Laboratories, Inc., Madison, NJ.

Potassium tetrachloroplatinate, tricyclohexylphosphine, tri-*n*-butylphosphine (10 wt% in hexanes), triethylphosphite, and triphenylphosphite were obtained from Strem Chemicals, Inc. and were used as received. *N, N*-Diisopropylethylamine (99%),  $[\text{PtCl}_2(\text{cod})]$  (98 %), triphenylphosphine (99 %), ether (99+ %, anhydrous), and chloroform (99+ %, anhydrous) were obtained from Sigma-Aldrich, Inc. and used as received. Hexane (HPLC grade) and ethyl acetate (HPLC grade) were obtained from Burdick and Jackson and used as received. Ethanol (200 proof) was obtained from Aaper Chemical Co. and used as received. Copper(I) iodide (Fluka, > 98 %) was used as received. 4-(Acetylthio)phenylacetylene was prepared in three steps from 4-iodophenylsulfonyl chloride (pipsyl chloride, Aldrich) by the method of Lindsey, et al.<sup>1</sup>

Dichloroplatinum complexes were prepared according to standard methods, which are summarized here for convenience. ***cis*- $[\text{PtCl}_2(\text{PPh}_3)_2]$ .**  $\text{K}_2\text{PtCl}_4 + 2.5 \text{ eq. PPh}_3$  in xylene, reflux 24 h, filter, wash with water. White powder,  $^{31}\text{P}$  NMR ( $\text{CDCl}_3$ ):  $\delta$  14.6,  $J_{\text{PtP}} = 3670 \text{ Hz}$ . ***cis*- $[\text{PtCl}_2(\text{PBu-}n)_2]$ .**  $\text{K}_2\text{PtCl}_4 + 2.1 \text{ equiv. PBu}_3$  in  $\text{H}_2\text{O}/\text{hexanes}$ , 65 °C, 1 h. Procedure gave a 2:1 mixture of *cis*-isomer and  $[\text{PtCl}(\text{PBu}_3)_3]\text{Cl}$ . The product was fused under nitrogen atmosphere

---

<sup>1</sup> Grykop, D. T.; Clausen, C.; Roth, K. M.; Dontha, N.; Bocian, D. F.; Kuhr, W. G.; Lindsey, J. S. *J. Org. Chem.* **2000**, *65*, 7345-7355.

at 160 °C for 1 h. A white solid and some yellow oil was obtained. The mixture was dissolved in hot EtOH and then cooled two days at -23 °C to give white prisms.  $^{31}\text{P}$  NMR ( $\text{CDCl}_3$ ):  $\delta$  -2.7 (t,  $J_{\text{PtP}} = 3515$  Hz). ***trans*-[PtCl<sub>2</sub>(PCy<sub>3</sub>)<sub>2</sub>]**. K<sub>2</sub>PtCl<sub>4</sub> + 3.0 equiv. PCy<sub>3</sub> in toluene, reflux 3 days, filter, wash with water. Light yellow powder,  $^{31}\text{P}$  NMR ( $\text{CDCl}_3$ ):  $\delta$  17.2 (t,  $J_{\text{PtP}} = 2396$  Hz). ***cis*-[PtCl<sub>2</sub>{P(OEt)<sub>3</sub>}<sub>2</sub>]**. PtCl<sub>2</sub>(cod) + 2.0 equiv. P(OEt)<sub>3</sub> in CHCl<sub>3</sub>, 10 min. Clear colorless oil,  $^{31}\text{P}$  NMR ( $\text{CDCl}_3$ ):  $\delta$  -72.1 (t,  $J_{\text{PtP}} = 5613$  Hz). ***cis*-[PtCl<sub>2</sub>{P(OPh)<sub>3</sub>}<sub>2</sub>]**. PtCl<sub>2</sub>(cod) + 2.0 equiv. P(OPh)<sub>3</sub> in CHCl<sub>3</sub>, 10 min. White solid,  $^{31}\text{P}$  NMR ( $\text{CDCl}_3$ ):  $\delta$  60.1 (t,  $J_{\text{PtP}} = 5794$  Hz).

***trans*-[4-AcSC<sub>6</sub>H<sub>4</sub>C≡C)<sub>2</sub>Pt(PCy<sub>3</sub>)<sub>2</sub>] (1a)**. A Schlenk flask was charged with *trans*-[PtCl<sub>2</sub>(PCy<sub>3</sub>)<sub>2</sub>] (0.350 g, 0.425 mmol), 4-AcSC<sub>6</sub>H<sub>4</sub>C≡CH (0.165 g, 0.936 mmol, 2.2 equiv.), CuI (0.020 g, 0.105 mmol), and CHCl<sub>3</sub> (15 mL). (*i*-Pr)<sub>2</sub>NEt (1.0 mL, 5.7 mmol) was added and the reaction mixture was heated in an oil-bath to 55-60 °C. The reaction was followed by  $^{31}\text{P}$  NMR. After 4 days, approximately 50 % conversion was achieved. The reaction mixture was filtered, concentrated to approximately 2-3 mL by rotary evaporation and diluted with EtOH. The resulting precipitate was washed with ether. The ether wh was evaporated to give 140 mg of a light yellow powder. The ethanol fraction was evaporated and washed with ether to give another 40 mg of material. The ether-soluble solids were combined and applied to a preparative TLC plate and developed with CHCl<sub>3</sub>. Three bands were resolved; the middle band was isolated to give 140 mg of a pale yellow powder (30 % yield).  $^{31}\text{P}$  NMR ( $\text{CDCl}_3$ ):  $\delta$  24.5, (t,  $J_{\text{PtP}} = 2399$  Hz).  $^{13}\text{C}$  NMR ( $\text{CDCl}_3$ ):  $\delta$  194.7, 133.7, 131.0, 130.8, 122.4, 115.1 (t,  $J_{\text{PtC}} = 30$  Hz), 109.0, 33.2 (t,  $J_{\text{PC}} = 14$  Hz), 39.9, 29.6, 27.6 (t,  $J_{\text{PC}} = 11$  Hz), 26.5.  $^1\text{H}$  NMR ( $\text{CDCl}_3$ ):  $\delta$  7.26 (m, 8 H), 2.85 (unresolved multiplet, 6H), 2.42 (s, 6 H), 2.09 (d,  $J_{\text{PC}} = 12$  Hz), 1.82-1.70 (broad singlets, 30 H), 1.24 (s, 18 H). IR (KBr disc)  $\text{cm}^{-1}$ : 2097 ( $\nu\text{C}\equiv\text{C}$ ), 1712 ( $\nu\text{C}=\text{O}$ ). Elemental analysis: calcd. for C<sub>56</sub>H<sub>80</sub>O<sub>2</sub>P<sub>2</sub>PtS<sub>2</sub> C 60.57, H 7.26, Pt 18.55; found C 60.79, H 7.29, Pt 17.63

***trans*-[4-AcSC<sub>6</sub>H<sub>4</sub>C≡C]<sub>2</sub>Pt(PBu<sub>3</sub>)<sub>2</sub>] (1b).** A mixture of *cis*-[PtCl<sub>2</sub>(PBu-*n*<sub>3</sub>)<sub>2</sub>] (0.54 g, 0.379 mmol), 4-AcSC<sub>6</sub>H<sub>4</sub>C≡CH (0.197 g, 1.25 mmol, 3.3 equiv.), CuI (0.010 g, 0.052 mmol), CHCl<sub>3</sub> (10 mL), and (*i*-Pr)<sub>2</sub>NEt (0.5 mL, 2.8 mmol) was heated in an oil-bath to 55-60 °C overnight. The reaction mixture was filtered, taken to dryness by rotary evaporation, and applied to a prep TLC plate. After a second plate, a single component was isolated, giving 169 mg of yellow oil which solidified upon standing (47 % yield). <sup>31</sup>P NMR (CDCl<sub>3</sub>): δ -2.5 (t, *J*<sub>PtP</sub> = 2253 Hz). <sup>13</sup>C NMR (CDCl<sub>3</sub>): δ 194.7, 134.0, 131.4, 130.4, 123.4, 111.6 (t, *J*<sub>PtC</sub> = 14 Hz), 108.6, 30.1, 26.3, 24.4 (t, *J*<sub>PC</sub> = 7 Hz), 23.9 (t, *J*<sub>PC</sub> = 17 Hz), 13.9. <sup>1</sup>H NMR (CDCl<sub>3</sub>): δ 7.42 (d, *J* = 8.4 Hz, 4 H), 7.23 (d, *J* = 8.4 Hz, 4 H), 2.37 (s, 6H), 2.01 (multiplet, 12 H), 1.51-1.39 (broad singlet, multiplet, 24 H), 0.93 (t, *J* = 7.3 Hz, 18 H). IR (KBr disc) cm<sup>-1</sup>: 2098 (νC≡C), 1703 (νC=O). Elemental analysis: calcd. for C<sub>44</sub>H<sub>68</sub>O<sub>2</sub>P<sub>2</sub>PtS<sub>2</sub> C 55.62, H 7.21, Pt 20.53; found C 54.81, H 7.11, Pt 19.87.

***trans*-[(4-AcSC<sub>6</sub>H<sub>4</sub>C≡C)<sub>2</sub>Pt(PPh<sub>3</sub>)<sub>2</sub>] (1c).** This compound has been previously reported,<sup>2</sup> but was obtained in higher yield (71 % v. 16 %) by this method. A mixture of *cis*-[PtCl<sub>2</sub>(PPh<sub>3</sub>)<sub>2</sub>] (0.250 g, 0.316 mmol), 4-AcSC<sub>6</sub>H<sub>4</sub>C≡CH (0.123 g, 0.696 mmol, 2.2 equiv.), CuI (0.010 g, 0.052 mmol), CHCl<sub>3</sub> (15 mL), and (*i*-Pr)<sub>2</sub>NEt (0.090 g, 0.696 mmol) was heated in an oil-bath to 55-60 °C. The reaction was monitored by <sup>31</sup>P NMR. After 2.5 h, the PtCl<sub>2</sub>(PPh<sub>3</sub>)<sub>2</sub> was consumed, and two product peaks at 22.0 and 19.2 ppm were present in approximately a 2:1 ratio, presumed to be the mono- and di-substitution products. An additional 60 mg (0.34 mmol) of 4-AcSC<sub>6</sub>H<sub>4</sub>C≡CH and 39 mg (0.30 mmol) of (*i*-Pr)<sub>2</sub>NEt were added and the reaction mixture was stirred and heated overnight. This resulted in complete conversion of the platinum complexes to a single product, as evidenced by <sup>31</sup>P NMR. The reaction mixture was allowed to

<sup>2</sup> Mayor, M.; Weber, H. B.; von Hanisch, C.; Reichert, J.; Beckman, D. *Angew. Chem. Int. Ed.* **2002**, *41*, 1183-1186.

cool to room temperature and was then diluted with EtOH (25 mL). Within a few minutes a precipitate started to form. The mixture was cooled at  $-10\text{ }^{\circ}\text{C}$  for 1 h, filtered, washed with water and EtOH, and air-dried to give 240 mg of orange needles (71% yield).  $^{31}\text{P}$  NMR ( $\text{CDCl}_3$ ):  $\delta$  19.6,  $J_{\text{PtP}} = 2630\text{ Hz}$ .  $^{13}\text{C}$  NMR ( $\text{CDCl}_3$ ):  $\delta$  194.8, 135.0 (t,  $J_{\text{PC}} = 6\text{ Hz}$ ), 133.2, 131.5, 131.1 (t,  $J_{\text{PC}} = 19\text{ Hz}$ ), 130.3, 129.9, 114.1, 112.8, 30.0.  $^1\text{H}$  NMR ( $\text{CDCl}_3$ ):  $\delta$  7.80 (multiplet, 12 H), 7.35 (multiplet, 18 H), 6.94 (d,  $J = 12\text{ Hz}$ , 4 H), 6.26 (d,  $J = 12\text{ Hz}$ , 4 H), 2.33 (s, 6 H). IR (KBr disc)  $\text{cm}^{-1}$ : 2105 ( $\nu\text{C}\equiv\text{C}$ ), 1700 ( $\nu\text{C}=\text{O}$ ).

***trans*-[(4-AcSC<sub>6</sub>H<sub>4</sub>C $\equiv$ C)<sub>2</sub>Pt{P(POEt)<sub>3</sub>}<sub>2</sub>] (1d).** A mixture of *cis*-[PtCl<sub>2</sub>{P(OEt)<sub>3</sub>}<sub>2</sub>] (0.299 g, 0.500 mmol), 4-AcSC<sub>6</sub>H<sub>4</sub>C $\equiv$ CH (0.200 g, 1.13 mmol, 2.27 equiv.), CuI (0.020 g, 0.105 mmol), CHCl<sub>3</sub> (10 mL), and (*i*-Pr)<sub>2</sub>NEt (1.0 mL, 5.7 mmol) was heated in an oil-bath to 55-60  $^{\circ}\text{C}$  overnight. Analysis by  $^{31}\text{P}$  NMR showed two products in nearly equal proportions, presumed to be the *cis*- and *trans*-complexes. The solvent was removed under vacuum and the residue was stirred vigorously in ether-acetone to separate any amine salts. After filtering, the residue was applied to a prep TLC plate and developed using CHCl<sub>3</sub>. The highest-R<sub>f</sub> band was collected to give 200 mg of an orange oil. Analysis by  $^{31}\text{P}$  NMR showed this fraction to be a mixture of the *trans*- and *cis*-complex in approximately a 2.5:1 ratio. A second prep TLC, developed with 3:1 hexane-ethyl acetate separated the isomers. The upper-R<sub>f</sub> band gave 135 mg of a light yellow oil, identified as the *trans*-complex, while the lower-R<sub>f</sub> band afforded 55 mg of the *cis*-complex. Both samples solidified upon standing overnight. Yield of the *trans*-complex was 31 %.  $^{31}\text{P}$  NMR ( $\text{CDCl}_3$ ):  $\delta$  99.8,  $J_{\text{PtP}} = 4064\text{ Hz}$ .  $^{13}\text{C}$  NMR ( $\text{CDCl}_3$ ):  $\delta$  194.3, 133.8, 131.8, 129.6, 124.2, 110.0 (t,  $J_{\text{PC}} = 3\text{ Hz}$ ), 102.4 (t,  $J_{\text{PC}} = 19\text{ Hz}$ ), 30.1, 16.3 (t,  $J_{\text{PC}} = 4\text{ Hz}$ ).  $^1\text{H}$  NMR ( $\text{CDCl}_3$ ):  $\delta$  7.32 (d,  $J = 8.4\text{ Hz}$ , 4 H), 7.23 (d,  $J = 8.4\text{ Hz}$ , 4 H), 4.33 (m, 12 H), 2.39 (s, 6 H), 1.37 (t,  $J_{\text{PH}} =$

7.2 Hz, 18 H). IR (KBr disc)  $\text{cm}^{-1}$ : 2115 ( $\nu\text{C}\equiv\text{C}$ ), 1702 ( $\nu\text{C}=\text{O}$ ). Elemental analysis: calcd. for  $\text{C}_{32}\text{H}_{44}\text{O}_8\text{P}_2\text{PtS}_2$  C 43.78, H 5.05, Pt 22.22; found C 43.75, H 4.88, Pt 21.41.

***trans*-[(4-AcSC<sub>6</sub>H<sub>4</sub>C $\equiv$ C)<sub>2</sub>Pt{P(OPh)<sub>3</sub>}<sub>2</sub>] (1d).** A mixture of *cis*-[PtCl<sub>2</sub>{P(OPh)<sub>3</sub>}<sub>2</sub>] (0.443 g, 0.500 mmol), 4-AcSC<sub>6</sub>H<sub>4</sub>C $\equiv$ CH (0.194 g, 1.10 mmol, 2.2 equiv.), CuI (0.020 g, 0.105 mmol), CHCl<sub>3</sub> (15 mL), and (*i*-Pr)<sub>2</sub>NEt (1.0 mL, 5.7 mmol) was heated in an oil-bath to 55-60 °C four days. Analysis by <sup>31</sup>P NMR showed that the starting material had been consumed, giving a mixture of the *trans*- and *cis*-complexes in approximately a 2:1 ratio. The reaction mixture was taken to dryness by rotary evaporation, redissolved in ca. 1 mL of CHCl<sub>3</sub>, and applied to a prep TLC plate, eluting with CHCl<sub>3</sub>. The highest and lowest-R<sub>f</sub> bands were cut, and the middle fraction was rechromatographed using 2% MeOH-CHCl<sub>3</sub>. A single band was isolated, giving 212 mg of an orange oil which solidified upon standing (36% yield). <sup>31</sup>P NMR (CDCl<sub>3</sub>):  $\delta$  79.5,  $J_{\text{PtP}}$  = 4590 Hz. <sup>1</sup>H NMR (CDCl<sub>3</sub>):  $\delta$  7.30-7.08 (multiplets, 39 H), 2.33 (s, 6 H). IR (KBr disc)  $\text{cm}^{-1}$ : 2119 ( $\nu\text{C}\equiv\text{C}$ ), 1712 ( $\nu\text{C}=\text{O}$ ). Elemental analysis: calcd. for  $\text{C}_{56}\text{H}_{44}\text{O}_8\text{P}_2\text{PtS}_2$  C 57.68, H 3.80; found C 57.45, H 3.83.

**SAM Formation and Characterization.** Gold on silicon surfaces were cleaned by a short rinse in acetone, followed by a 10 min air plasma cleaning. Flat substrates were used the same day they were cleaned. Gold wires (10  $\mu\text{m}$  diam.) were cleaned by immersion in 30% hydrogen peroxide for 10 minutes, followed by rinses in deionized water and 100% ethanol. Gold wires were used that day, or stored for short periods (2-4 days) in 100% ethanol. Molecular wire solutions were made with oxygen free solvents and in an inert atmosphere glovebox, and all depositions were performed in an inert atmosphere glovebox to prevent polymerization. Solutions of the Pt wires were created by dissolving 1.4 mg of the platinum complex in 4 mL of THF and 60  $\mu\text{L}$  of conc. Sulfuric acid. The molecules were allowed to

deprotect *in situ* and deposit on the gold substrates for 24 hours. After deposition substrates were rinsed in THF and 100% ethanol. Flat substrates were analyzed using multi-wavelength ellipsometry and contract angle measurements to characterize film quality.

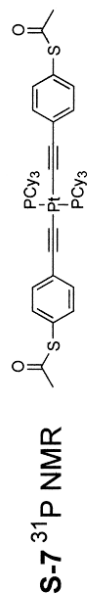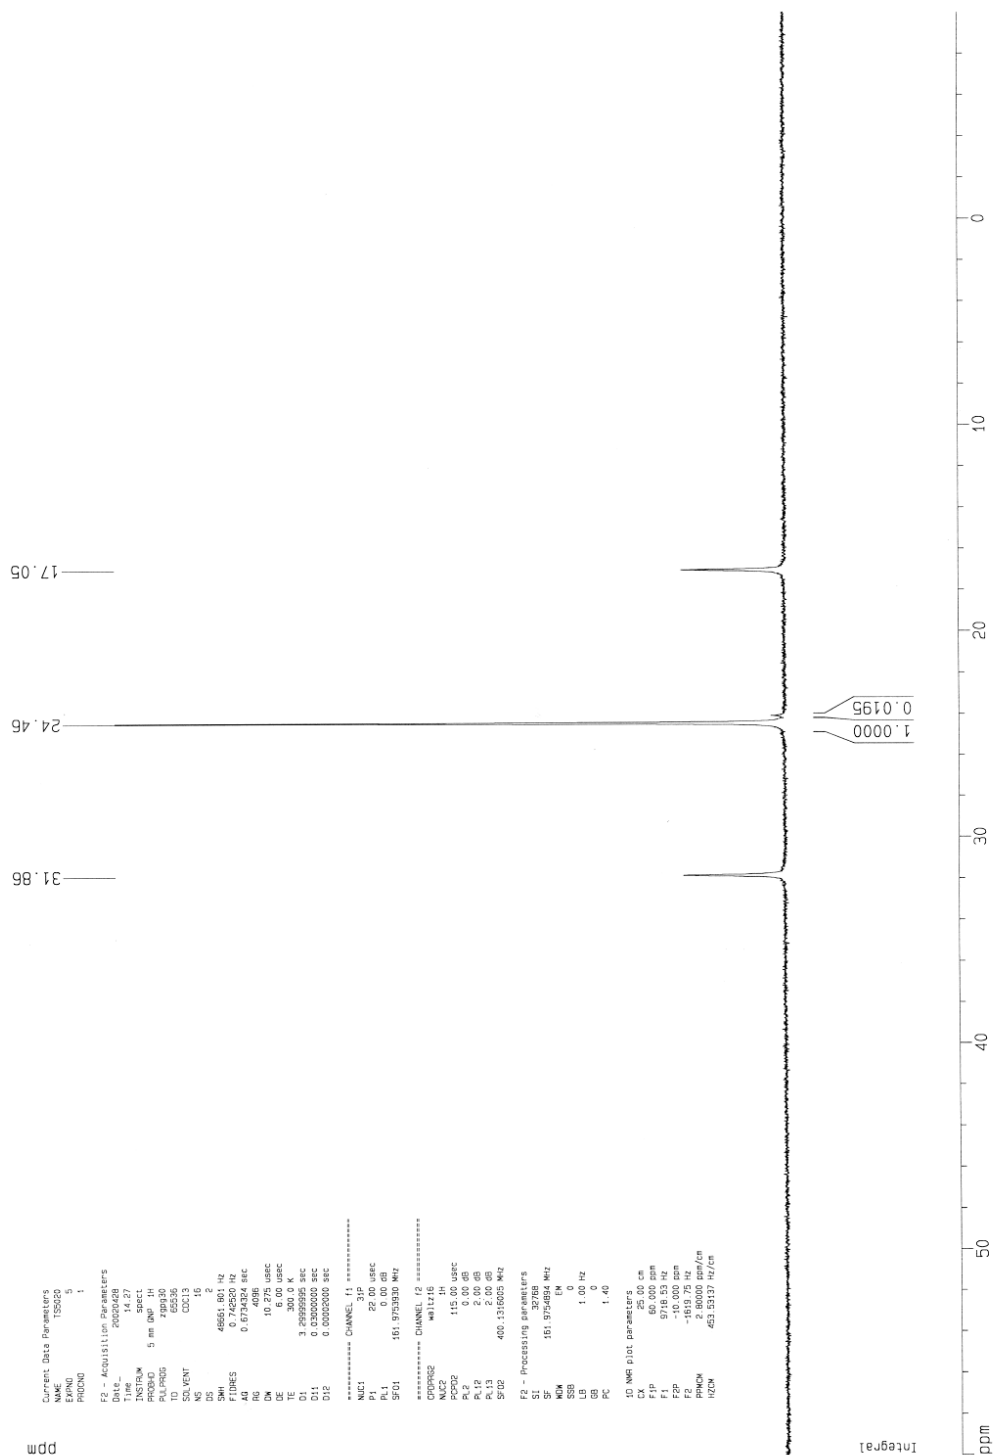

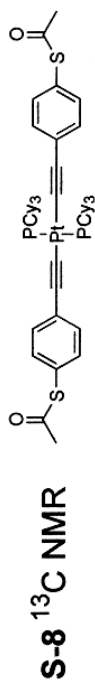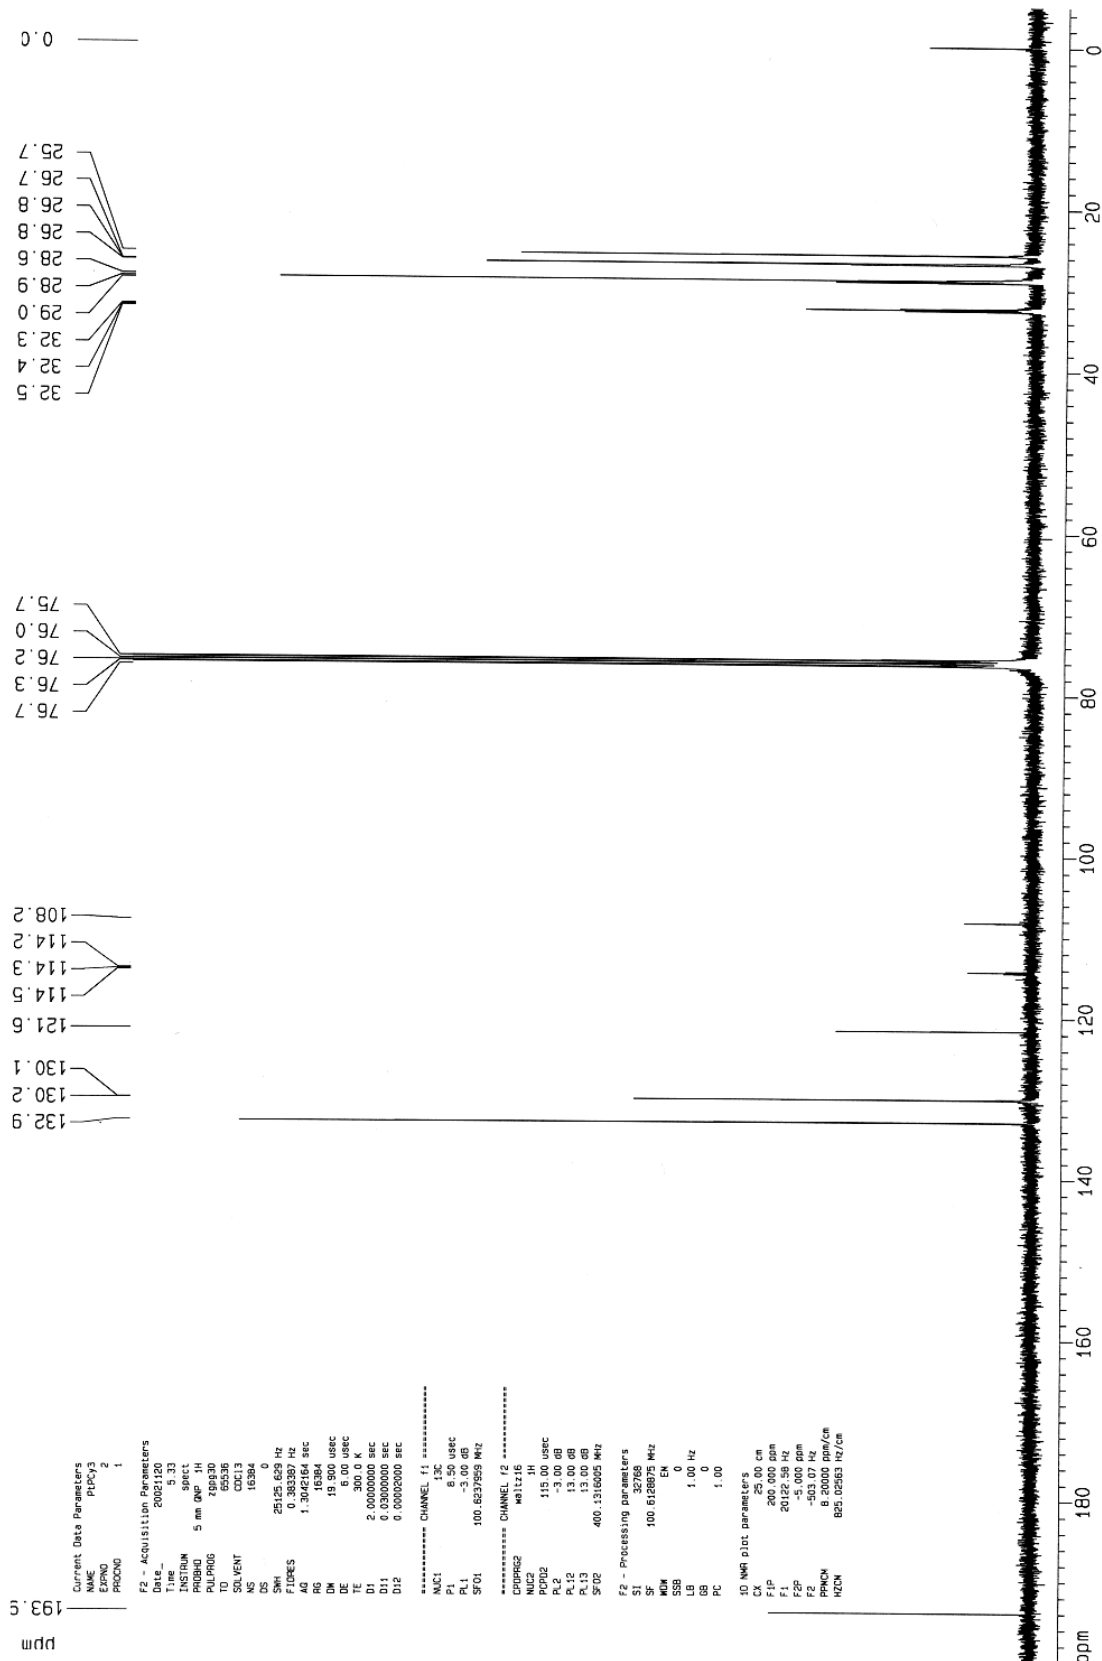

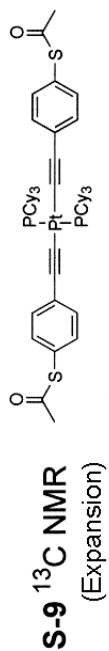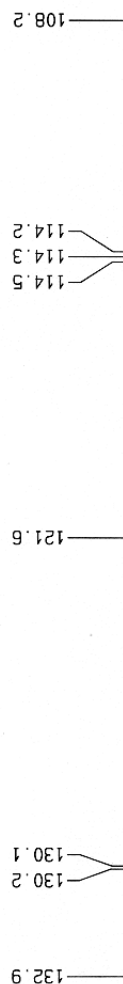

ppm

Current Data Parameters  
NAME P1PCY3  
EXPNO 2  
PROCNO 1

F2 - Acquisition Parameters  
Date\_ 20021120  
Time 15.33  
INSTRUM spect  
PROBHD 5 mm QNP 1H  
PULPROG zgpg30  
TD 65536  
FIDRES 0.2513  
AQ 10.384  
RG 0  
SNR 25125.629 Hz  
FIDRES 0.383397 Hz  
AQ 1.361864 sec  
RG 16384  
DE 15.500 usec  
TE 300.0 K  
D1 2.00000000 sec  
D11 0.03000000 sec  
D12 0.00002000 sec

===== CHANNEL f1 =====  
NUC1 13C  
P1 8.50 usec  
PL1 -3.00 dB  
SF01 100.623759 MHz

===== CHANNEL f2 =====  
CPDPRG2 waltz16  
NUC2 1H  
PCPD2 115.00 usec  
PL2 13.00 dB  
PL3 13.00 dB  
PL13 13.00 dB  
SF02 400.1316005 MHz

F2 - Processing parameters  
SI 32768  
SF 100.6128975 MHz  
WDW EN  
SSB 0  
LB 1.00 Hz  
GB 0  
PC 1.00

1D NMR plot parameters  
CZ 0.00000000 sec  
F1 14156.42 Hz  
F2 100.000 ppm  
F2 10051.29 Hz  
PC 1.00000000 sec/cm  
WDW EN  
SSB 0

ppm

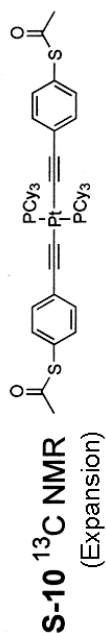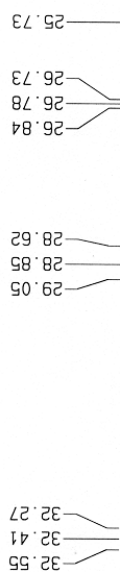

ppm

Current Data Parameters  
NAME PtPCy3  
EXPNO 2  
PROCNO 1

F2 - Acquisition Parameters  
Date\_ 20021220  
Time 18.33  
INSTRUM spect  
PROBHD 5 mm QNP 1H  
PULPROG zgpg30  
TD 65536  
SFO 400.141  
AQ 0.18151  
RG 16384  
DS 0  
SWH 28125.629 Hz  
FIDRES 0.363387 Hz  
AQRES 1.1400000 sec  
RG 16384  
DM 19.500 usec  
DE 6.00 usec  
TE 300.2 K  
D1 2.00000000 sec  
D11 0.03000000 sec  
D12 0.00000000 sec

===== CHANNEL f1 =====  
NUC1 13C  
P1 8.50 usec  
PL1 -3.00 dB  
SFO1 100.627759 MHz

===== CHANNEL f2 =====  
CPDPRG2 waltz16  
NUC2 13C  
P2 115.00 usec  
PL2 -3.00 dB  
PL12 13.00 dB  
PL13 13.00 dB  
SFO2 400.1316000 MHz

F2 - Processing parameters  
SI 32768  
SF 100.6128571 MHz  
WDW EM  
SSB 0  
LB 1.00 Hz  
GB 0  
PC 1.00

10 NMR plot parameters  
CX 28.00 cm  
CY 28.00 cm  
F1 4029.52 ppm  
F2 20.000 ppm  
F3 2012.26 Hz  
PNUC1 0.80000 ppm/cm  
PNUC2 86.45631 Hz/cm

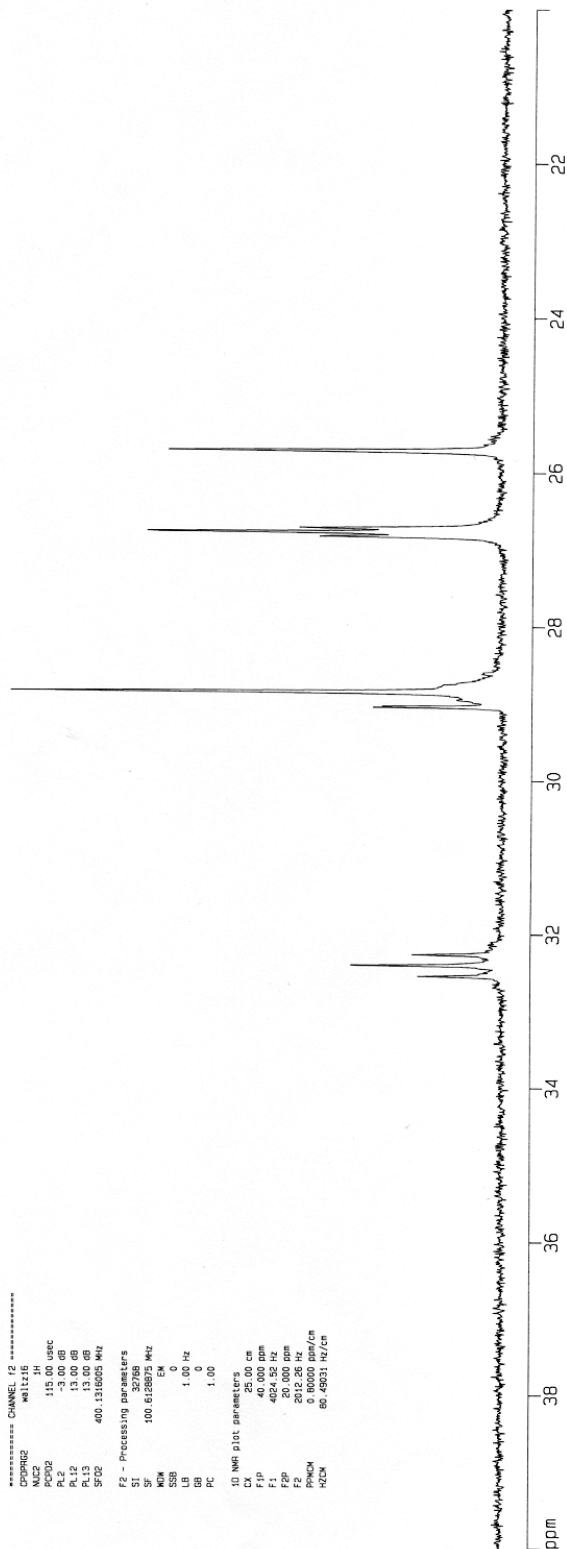

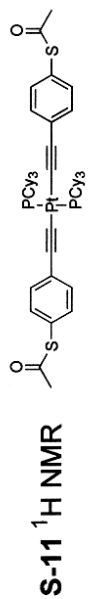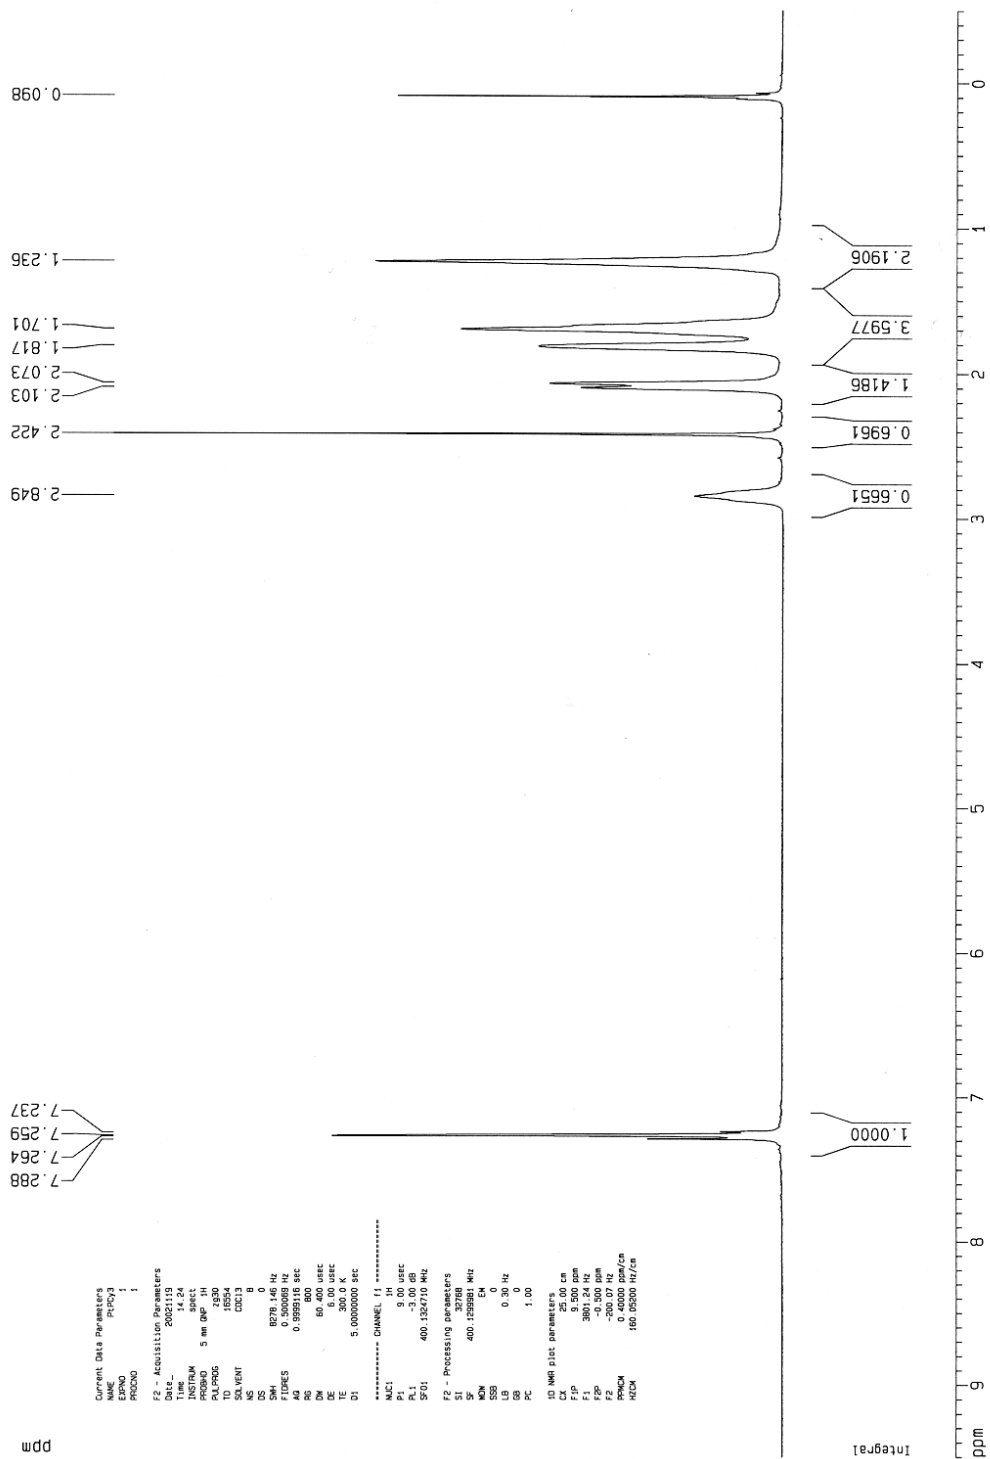

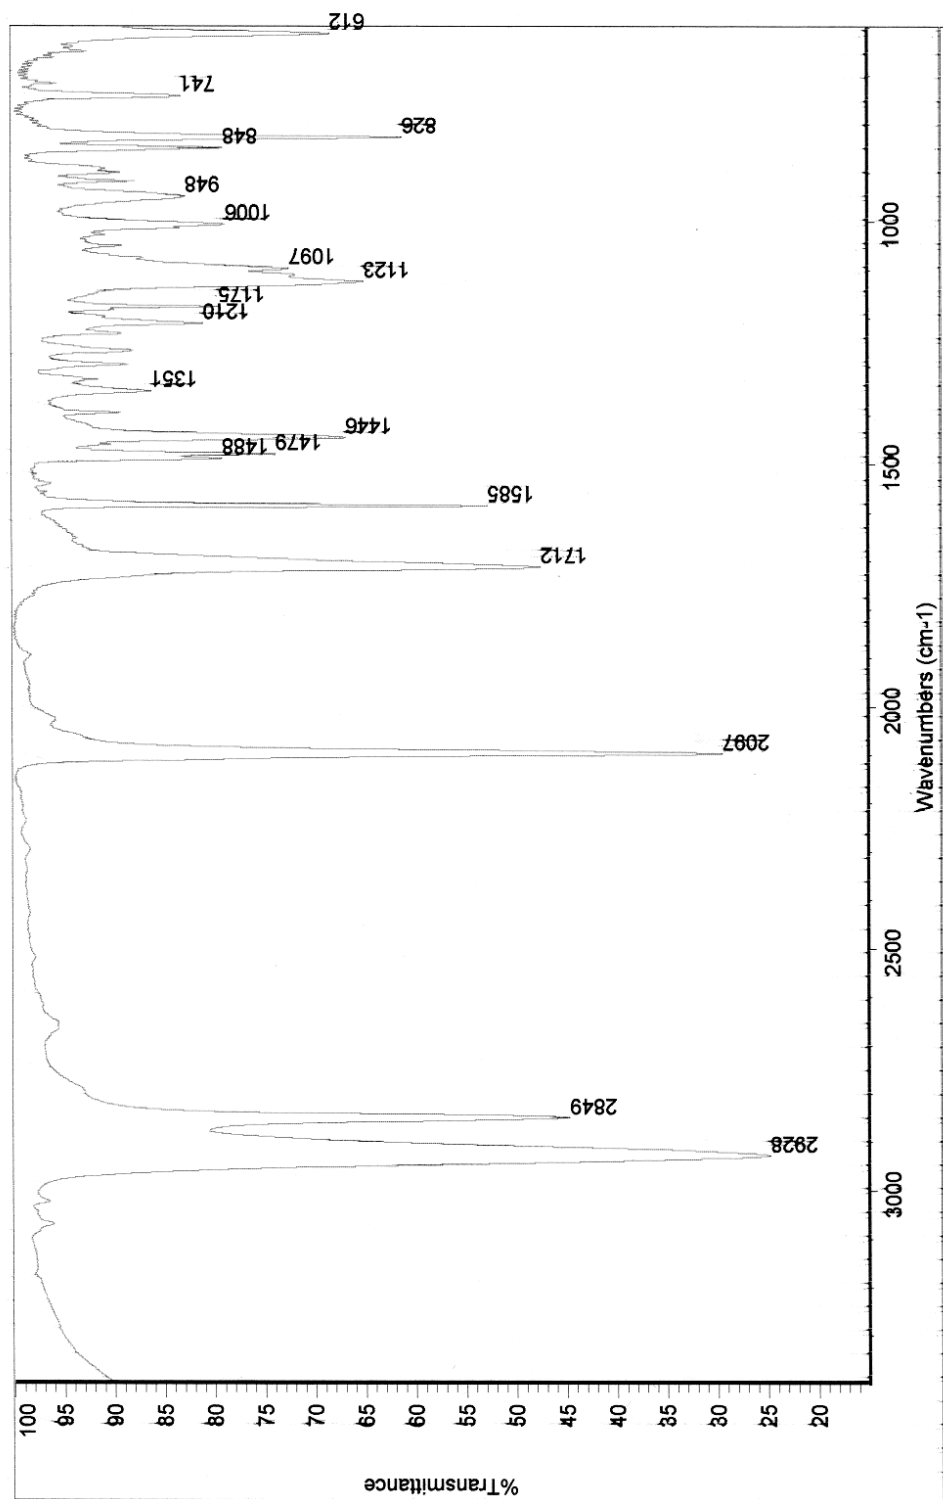

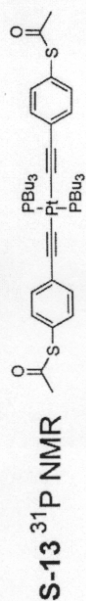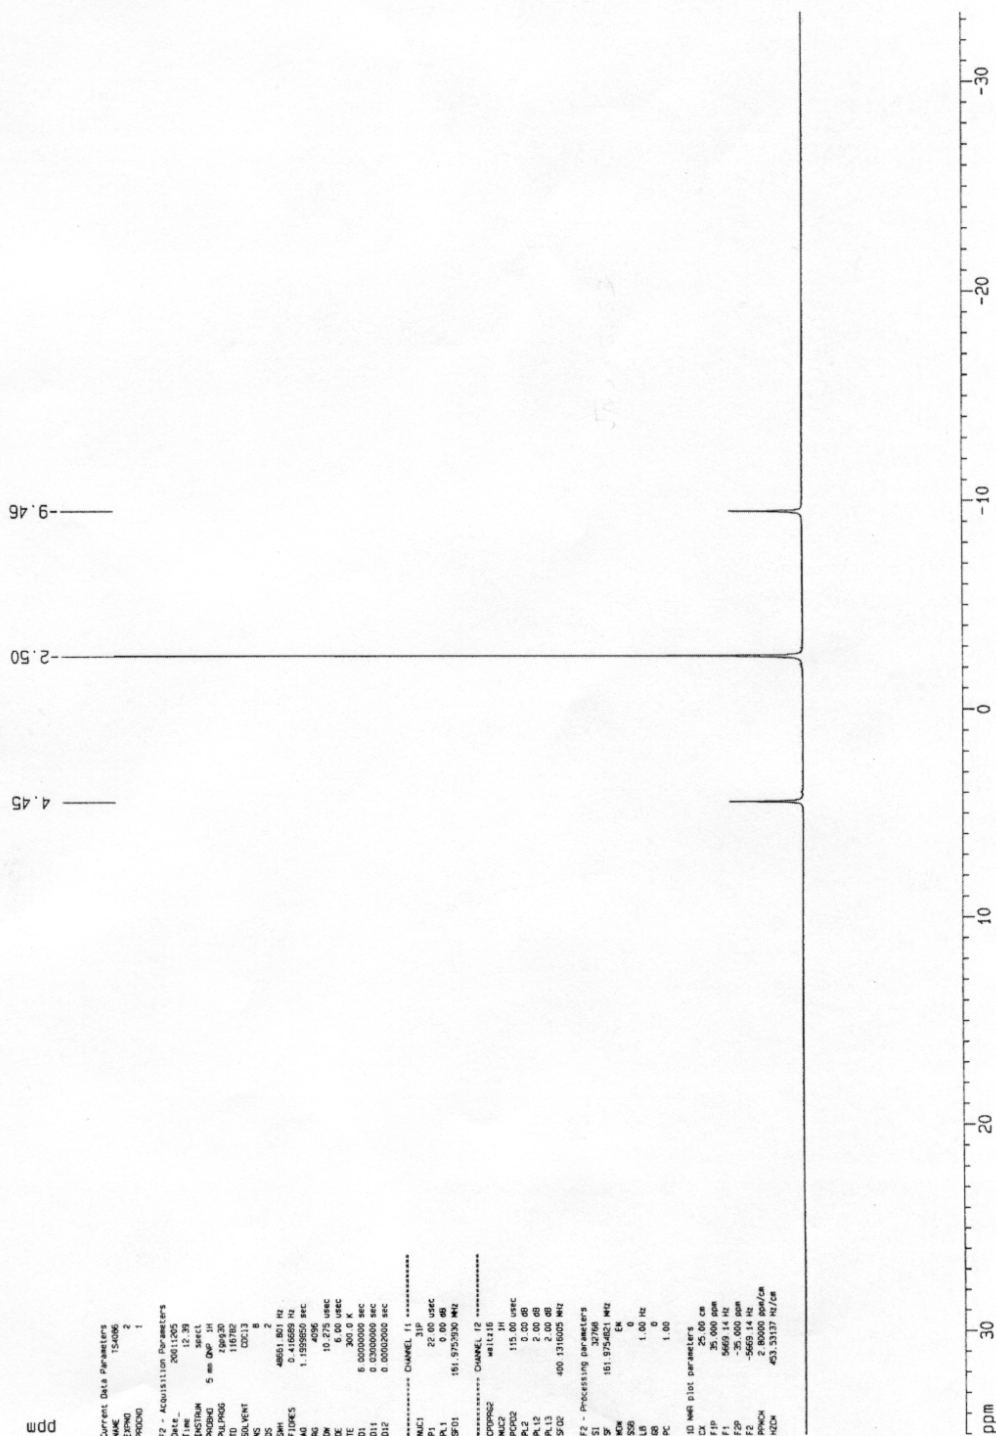

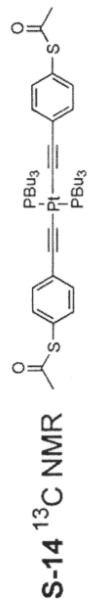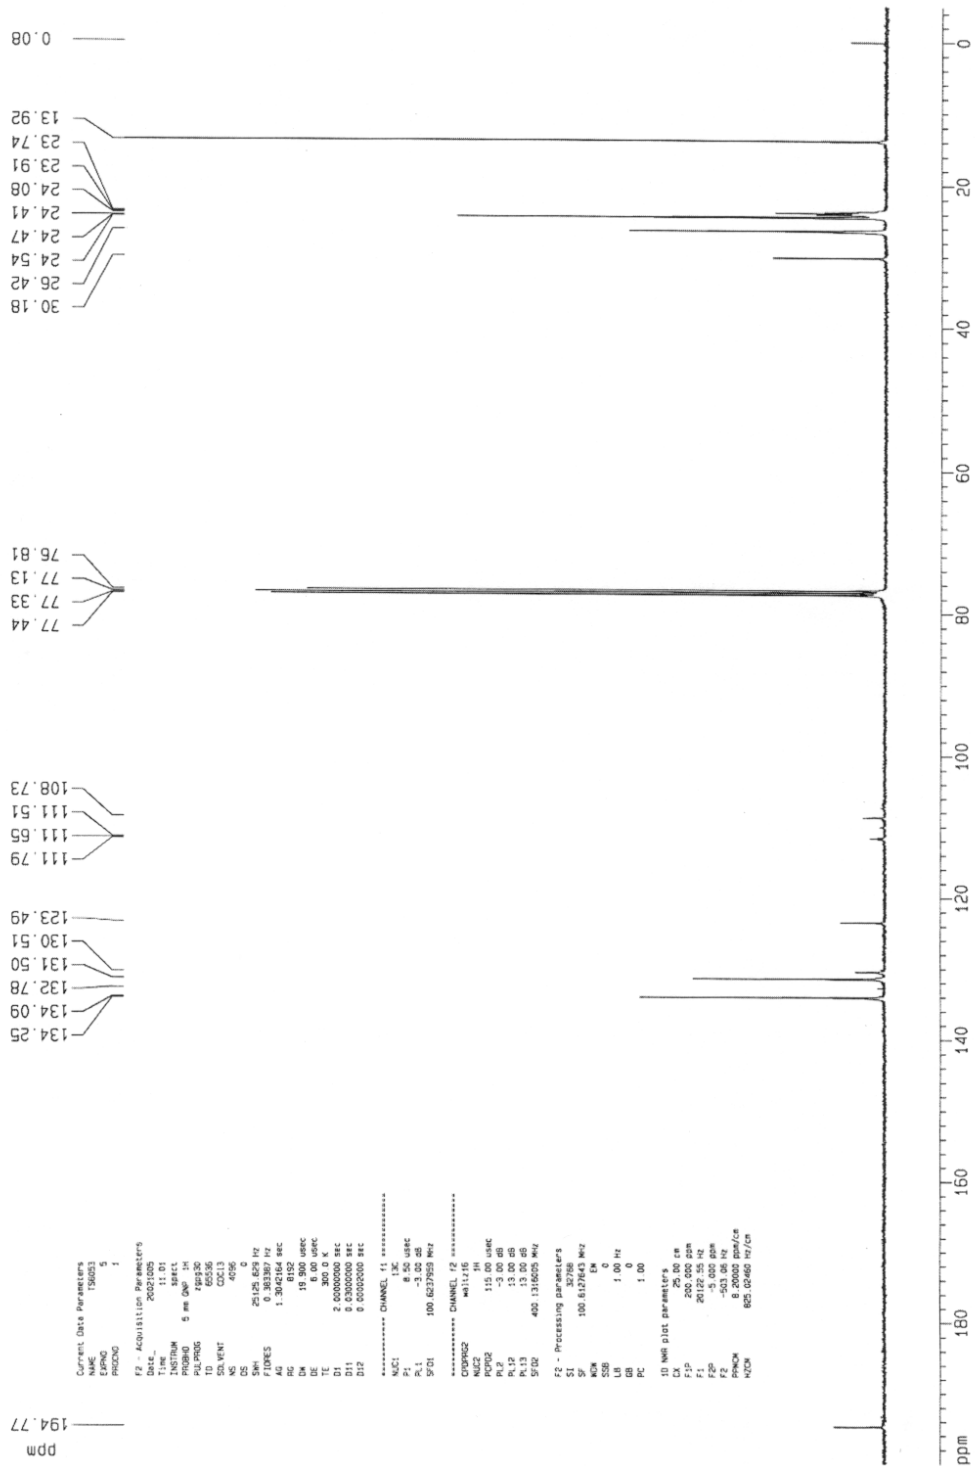

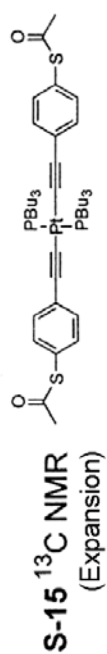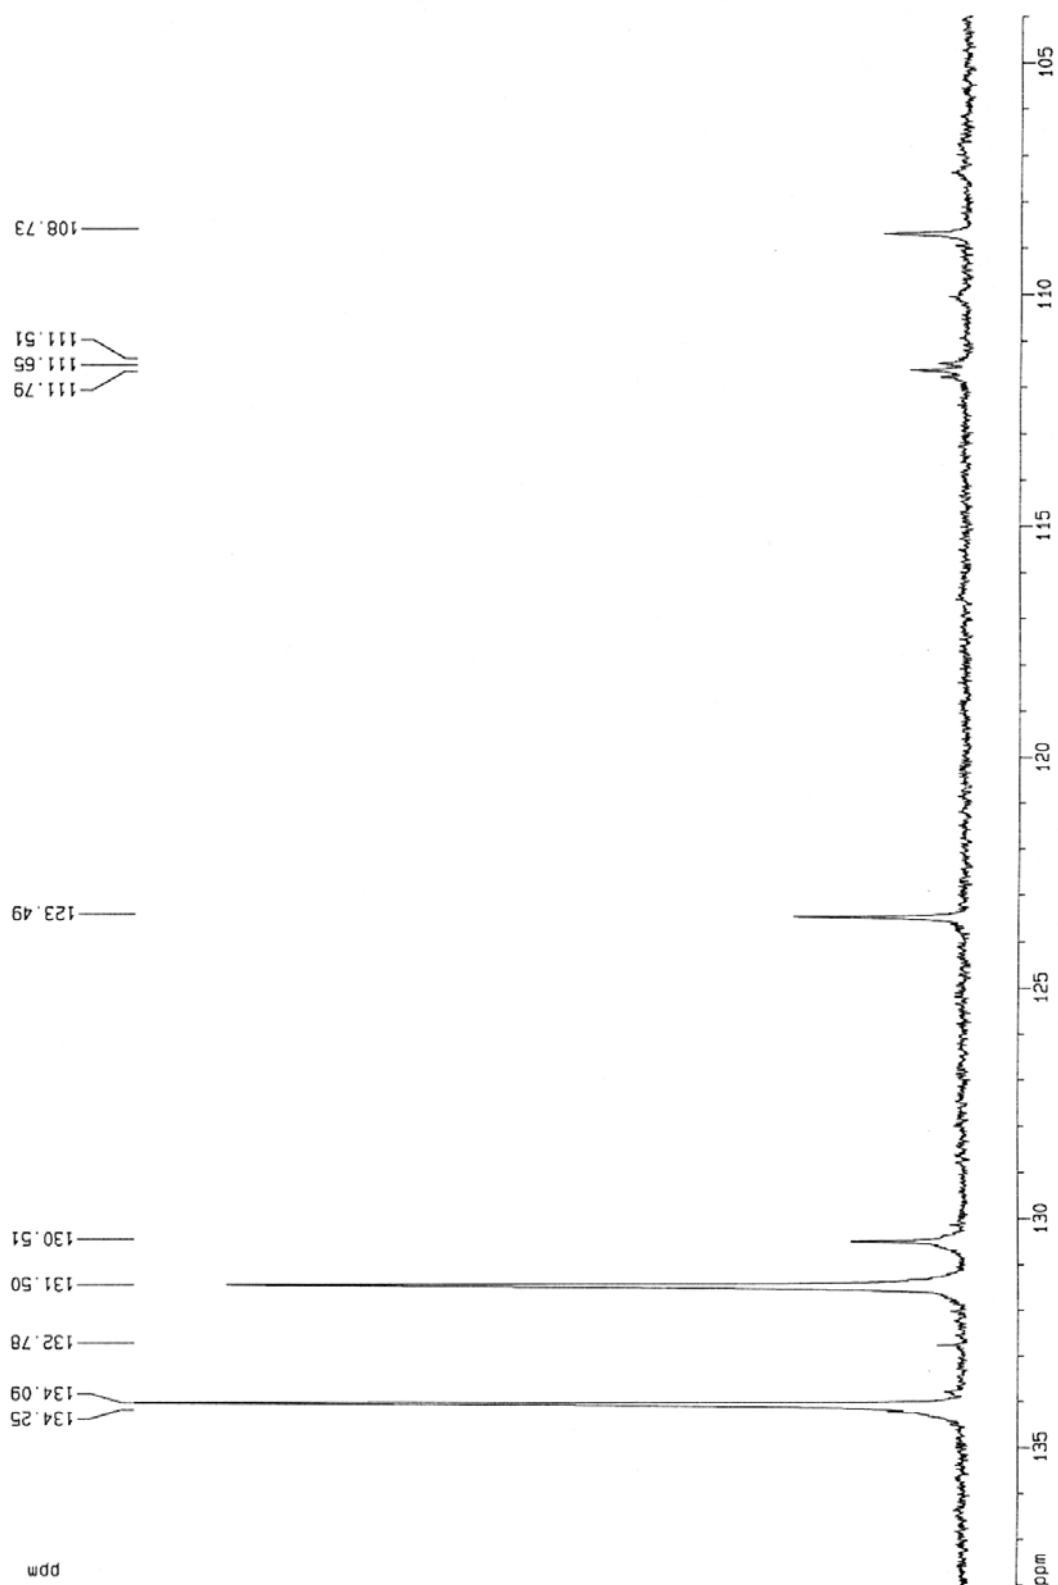

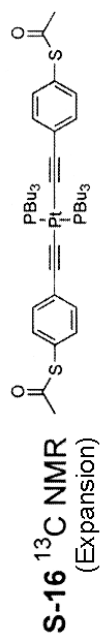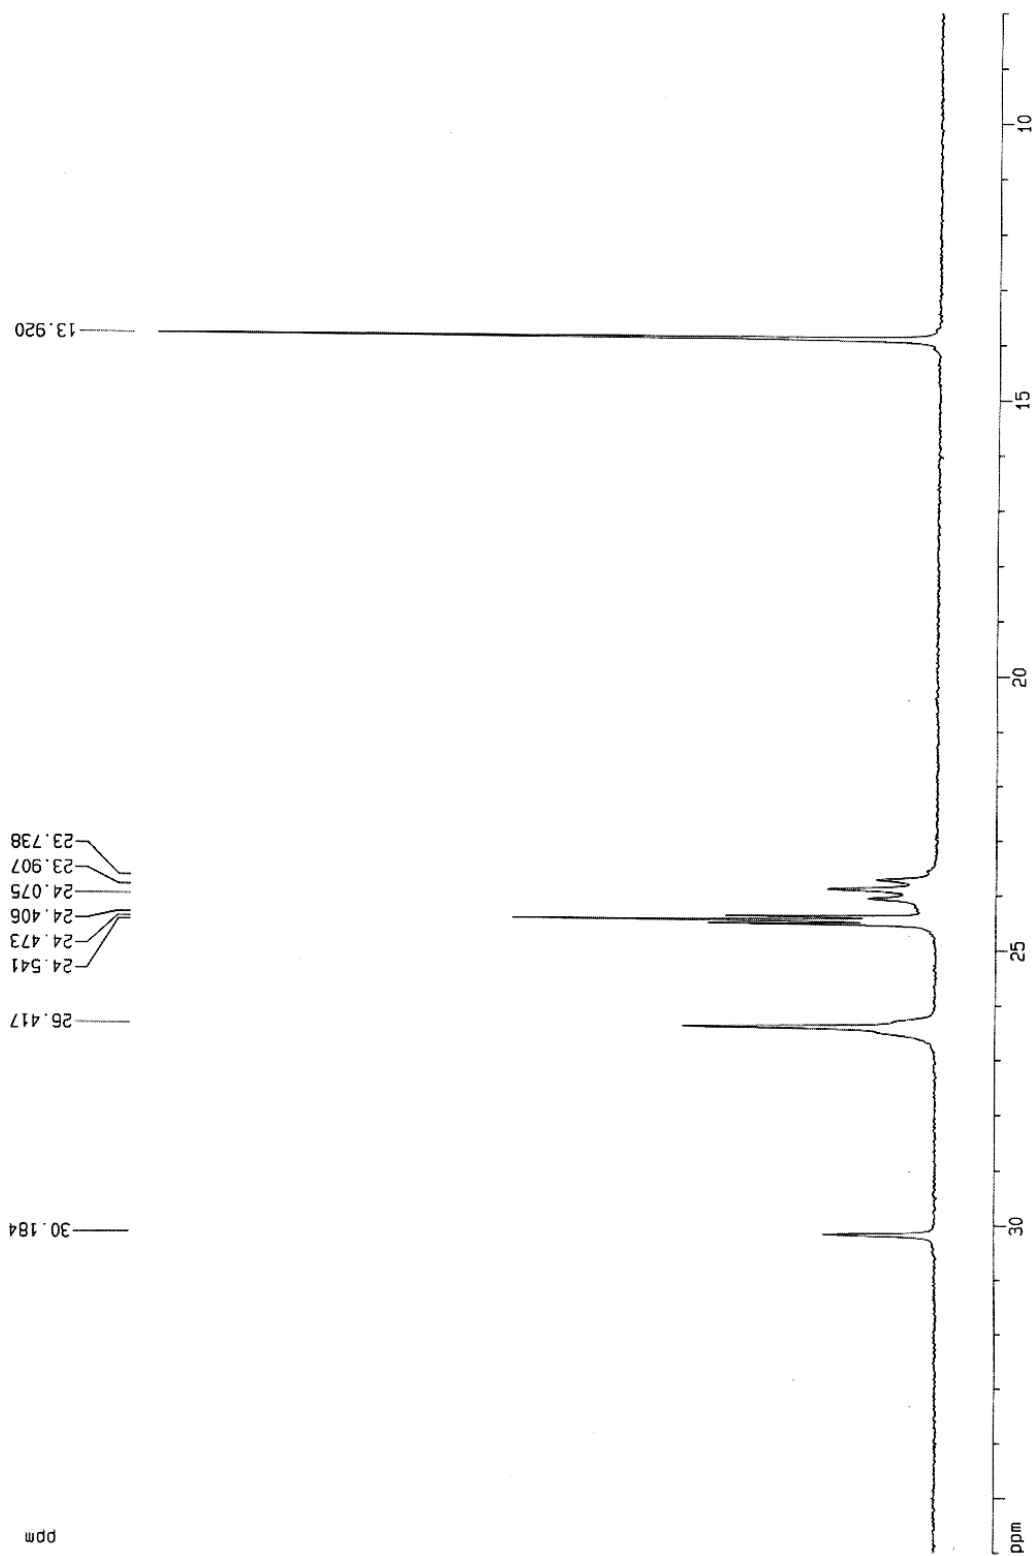

**S-17**  $^1\text{H}$  NMR

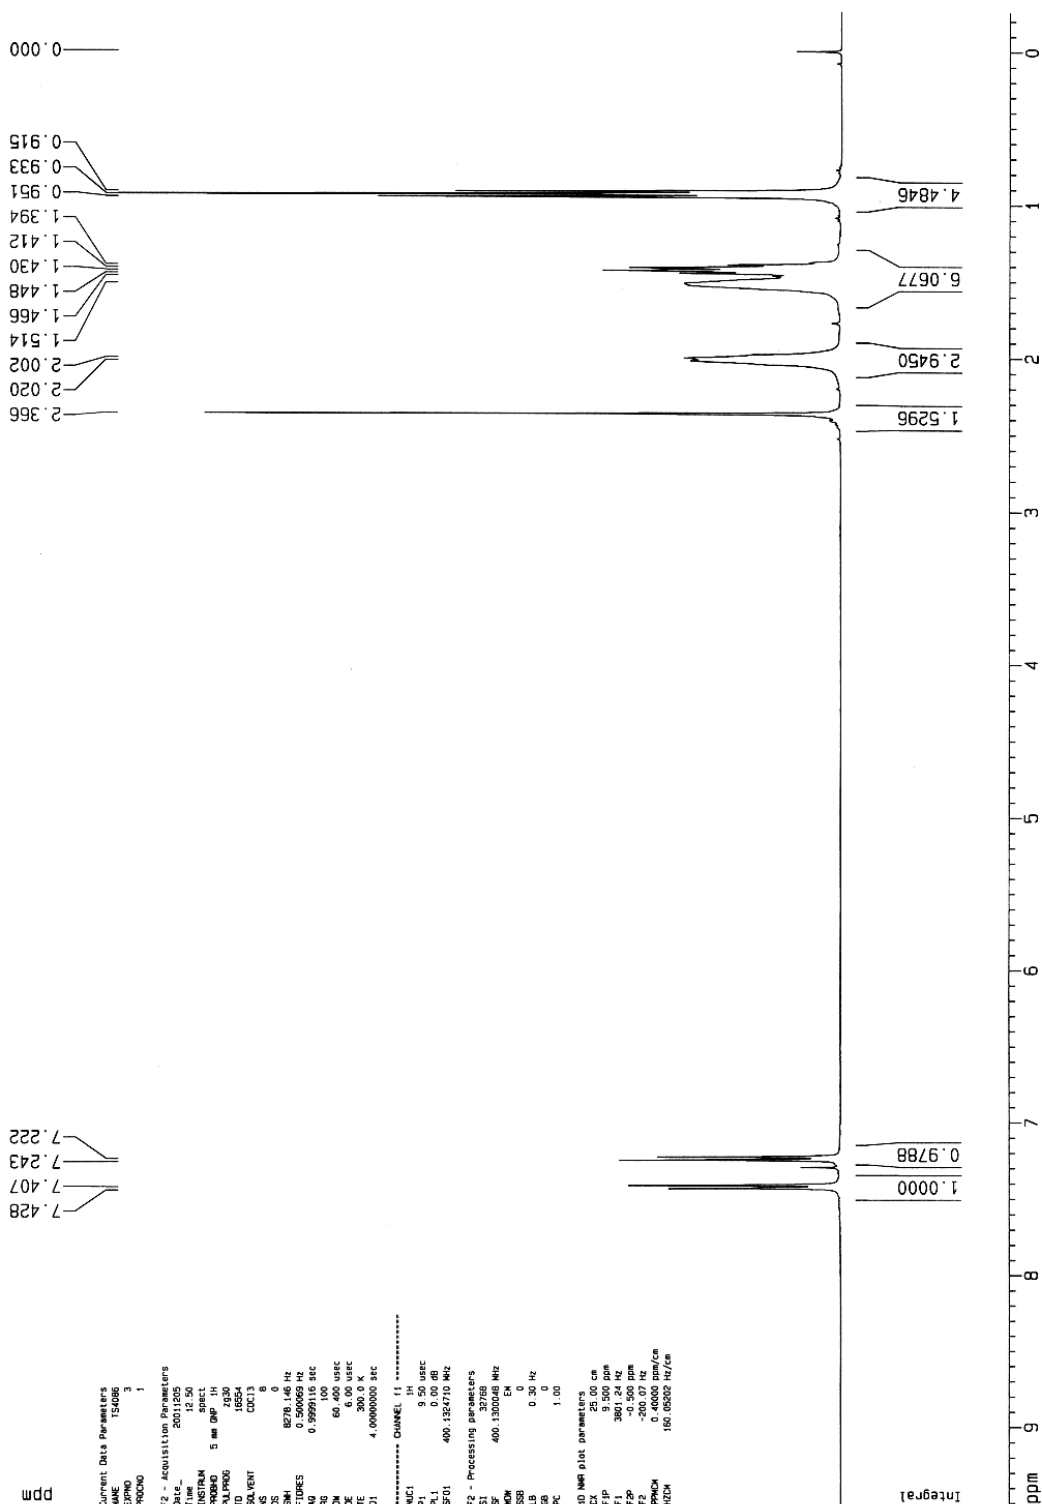

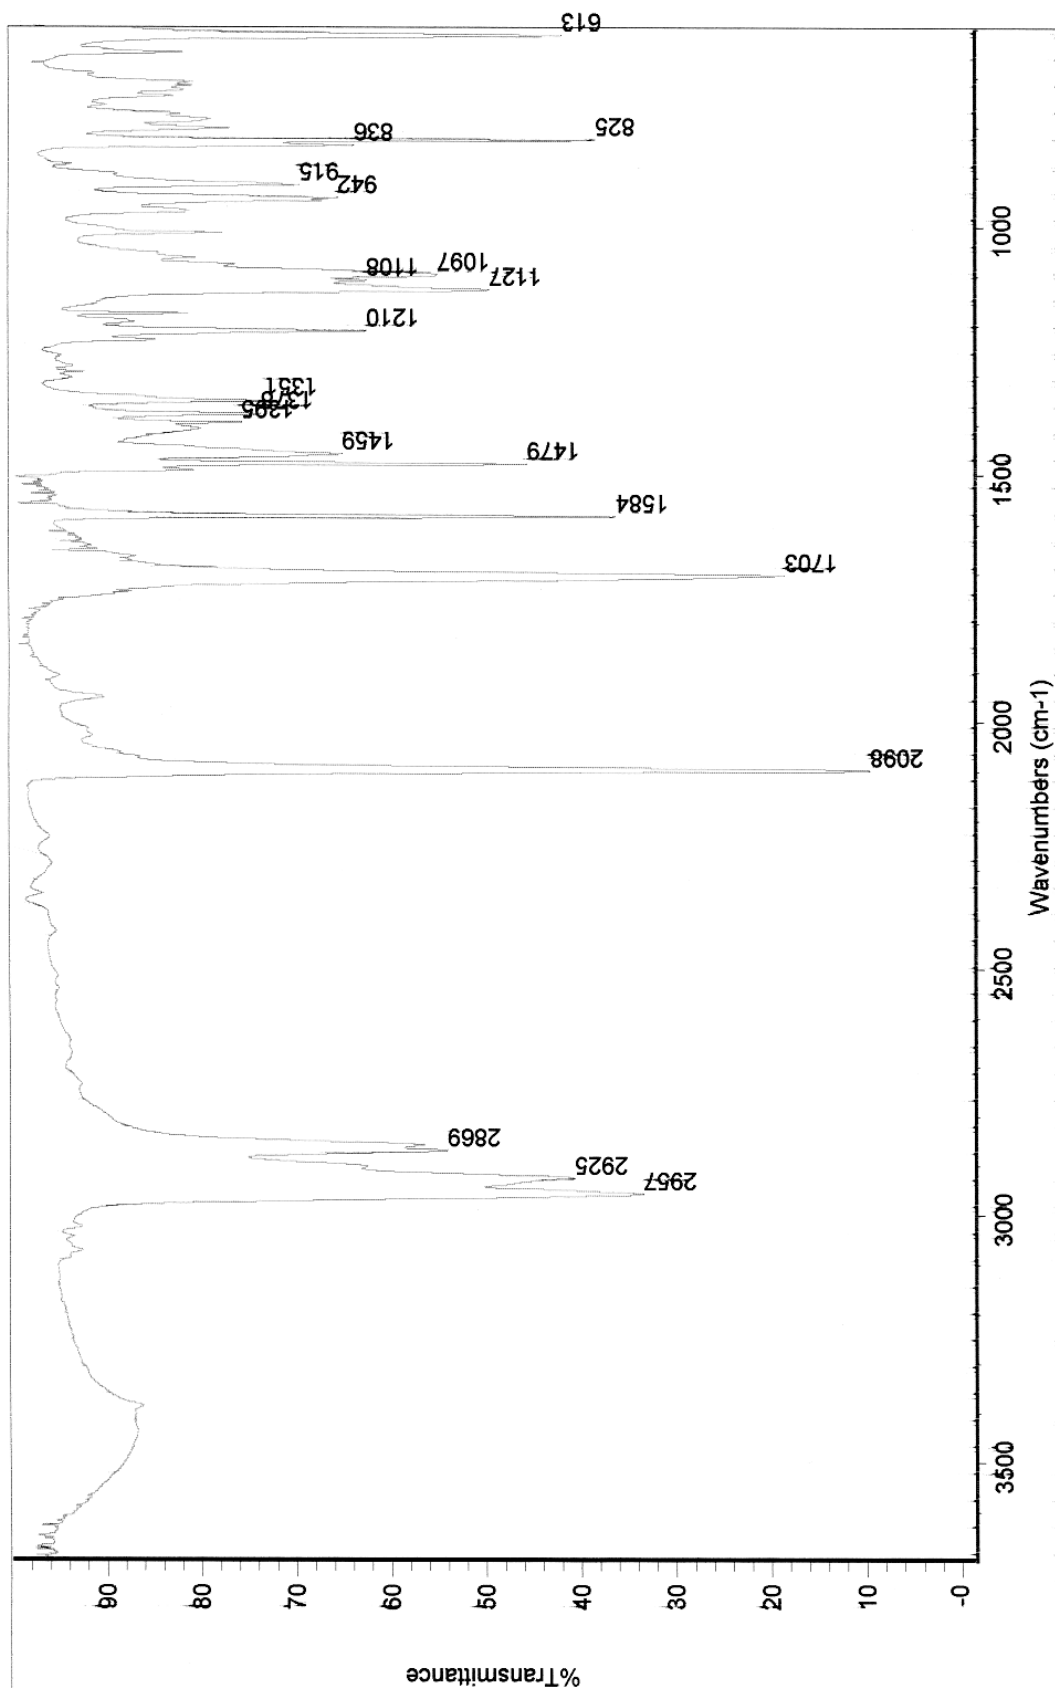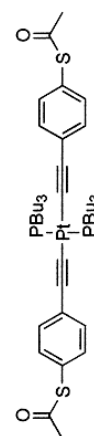

# S-18 IR

Date: Thu Oct 03 15:27:45 2002

Scans: 64

Resolution: 2.000

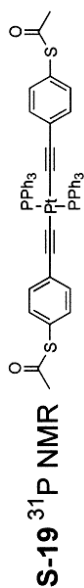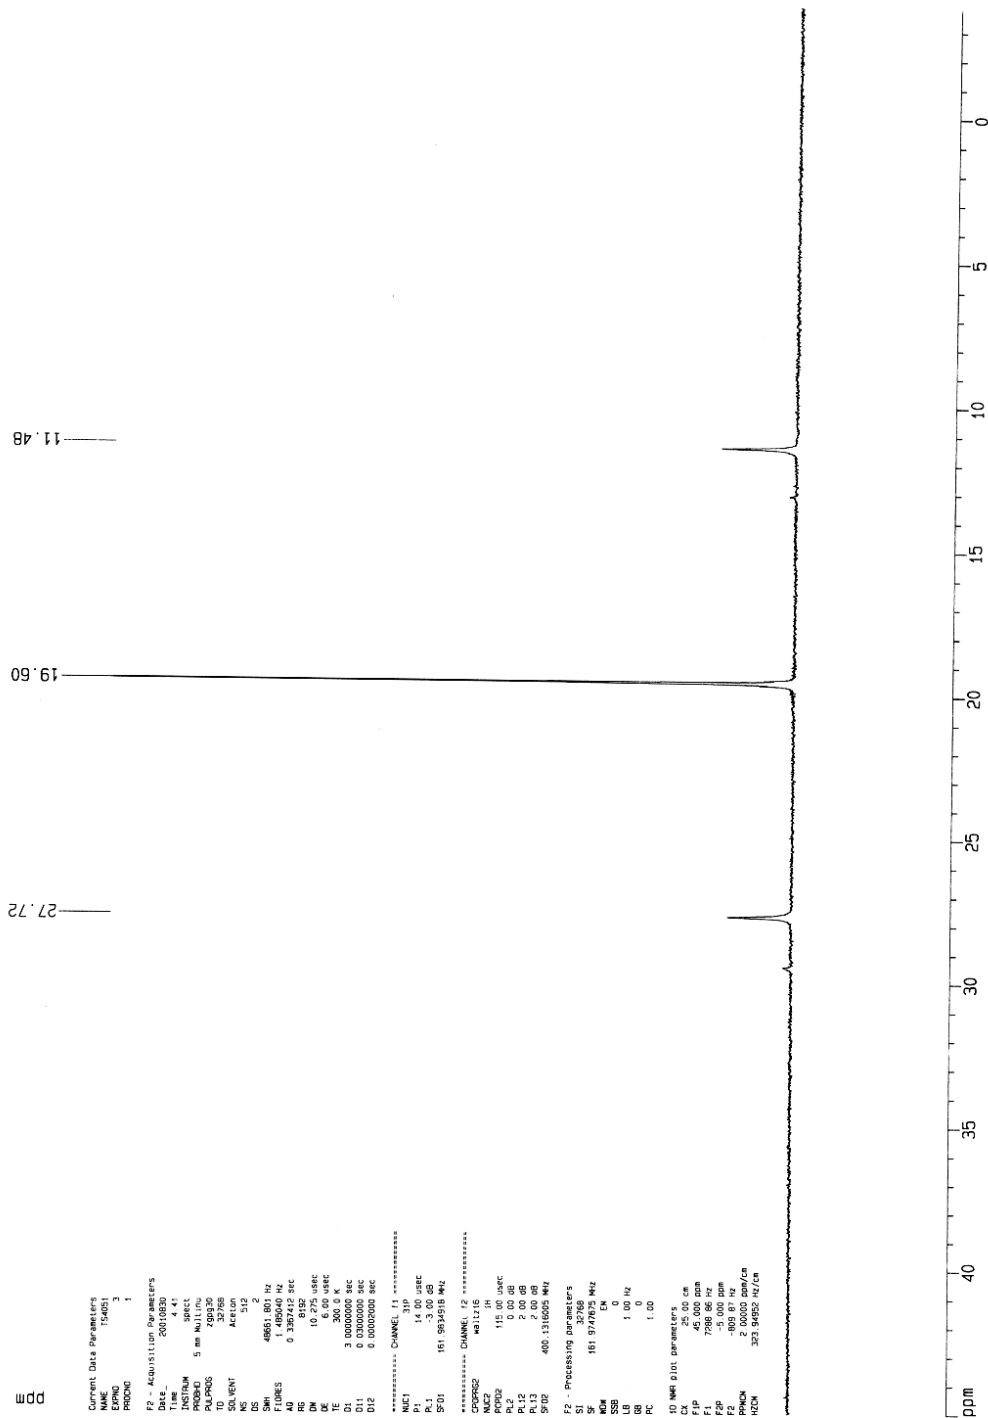

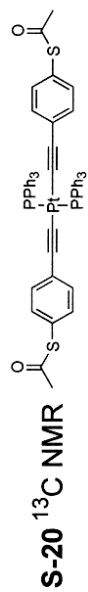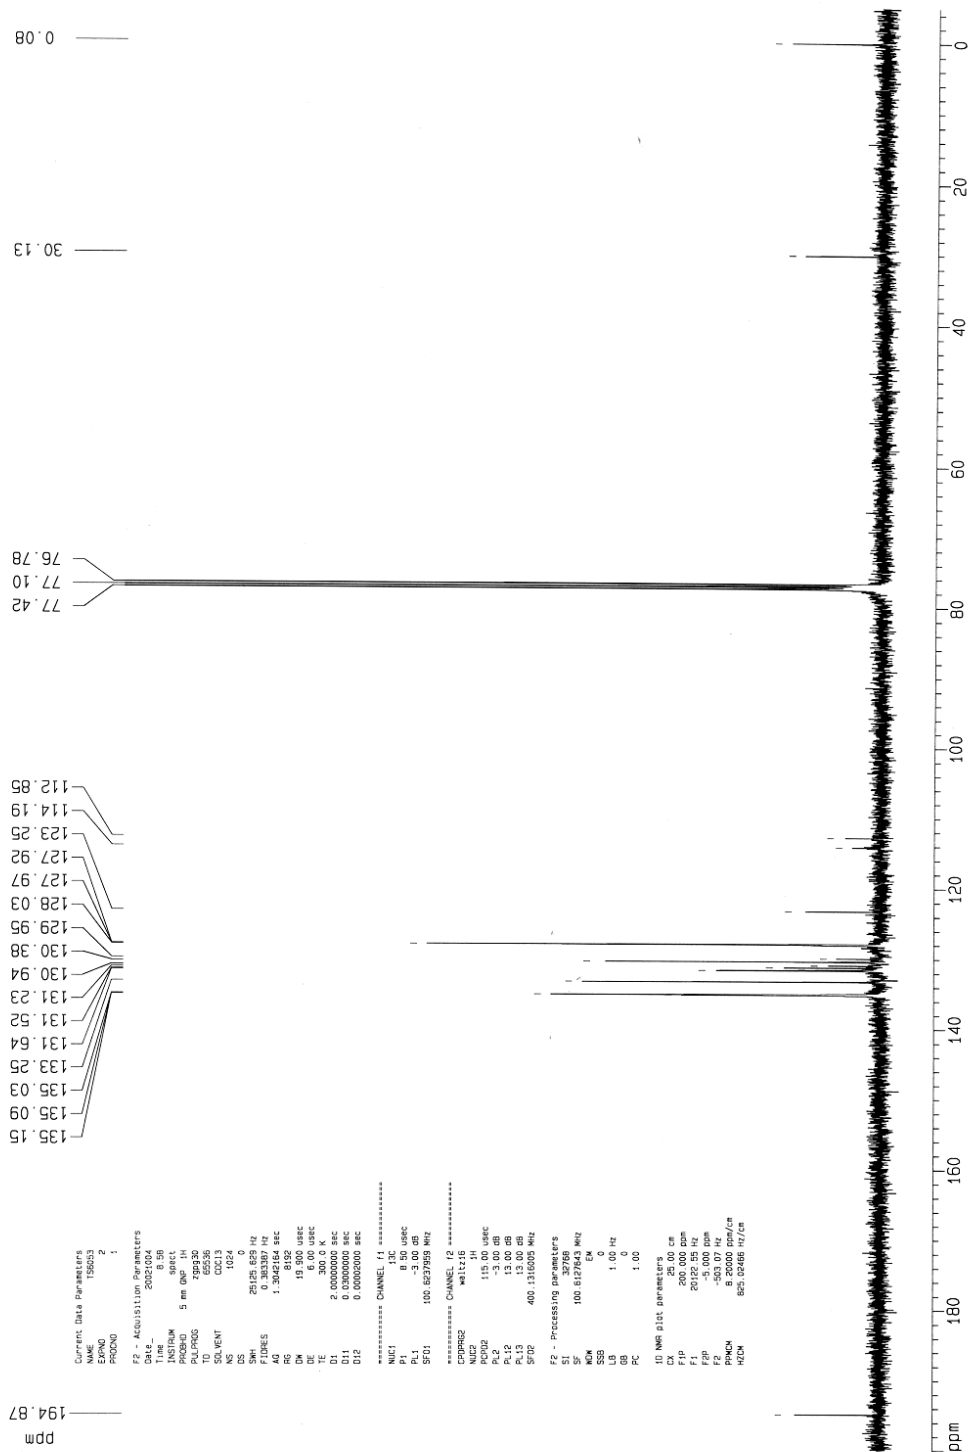

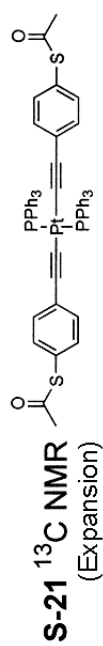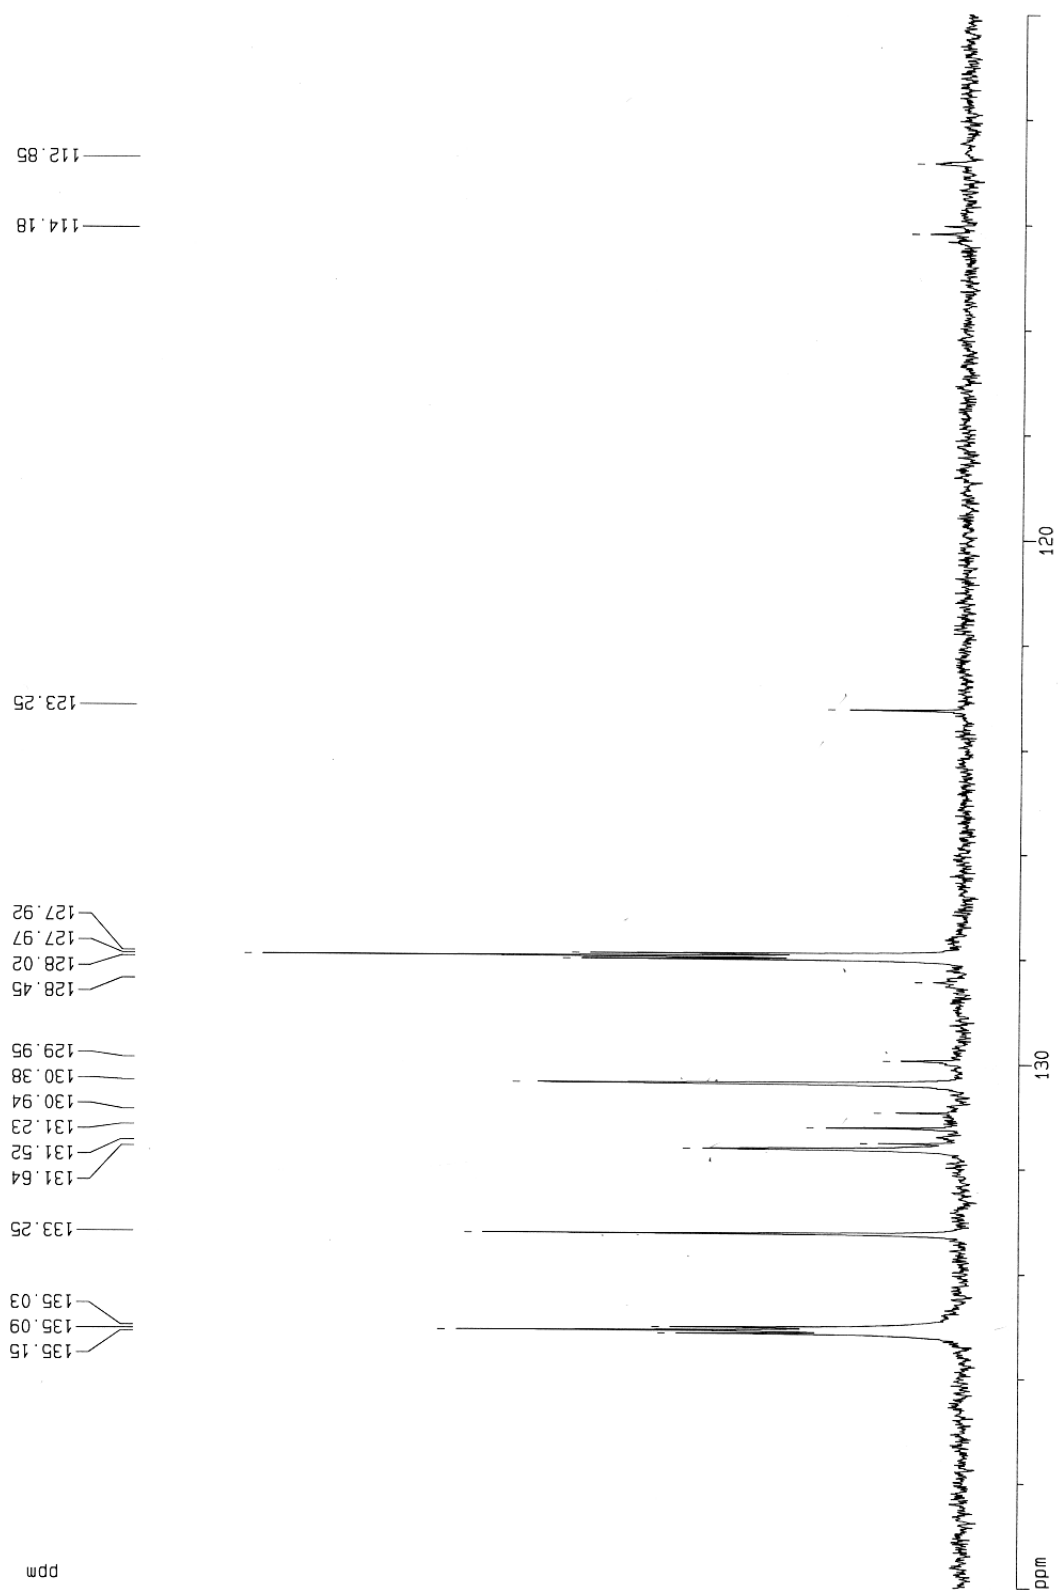

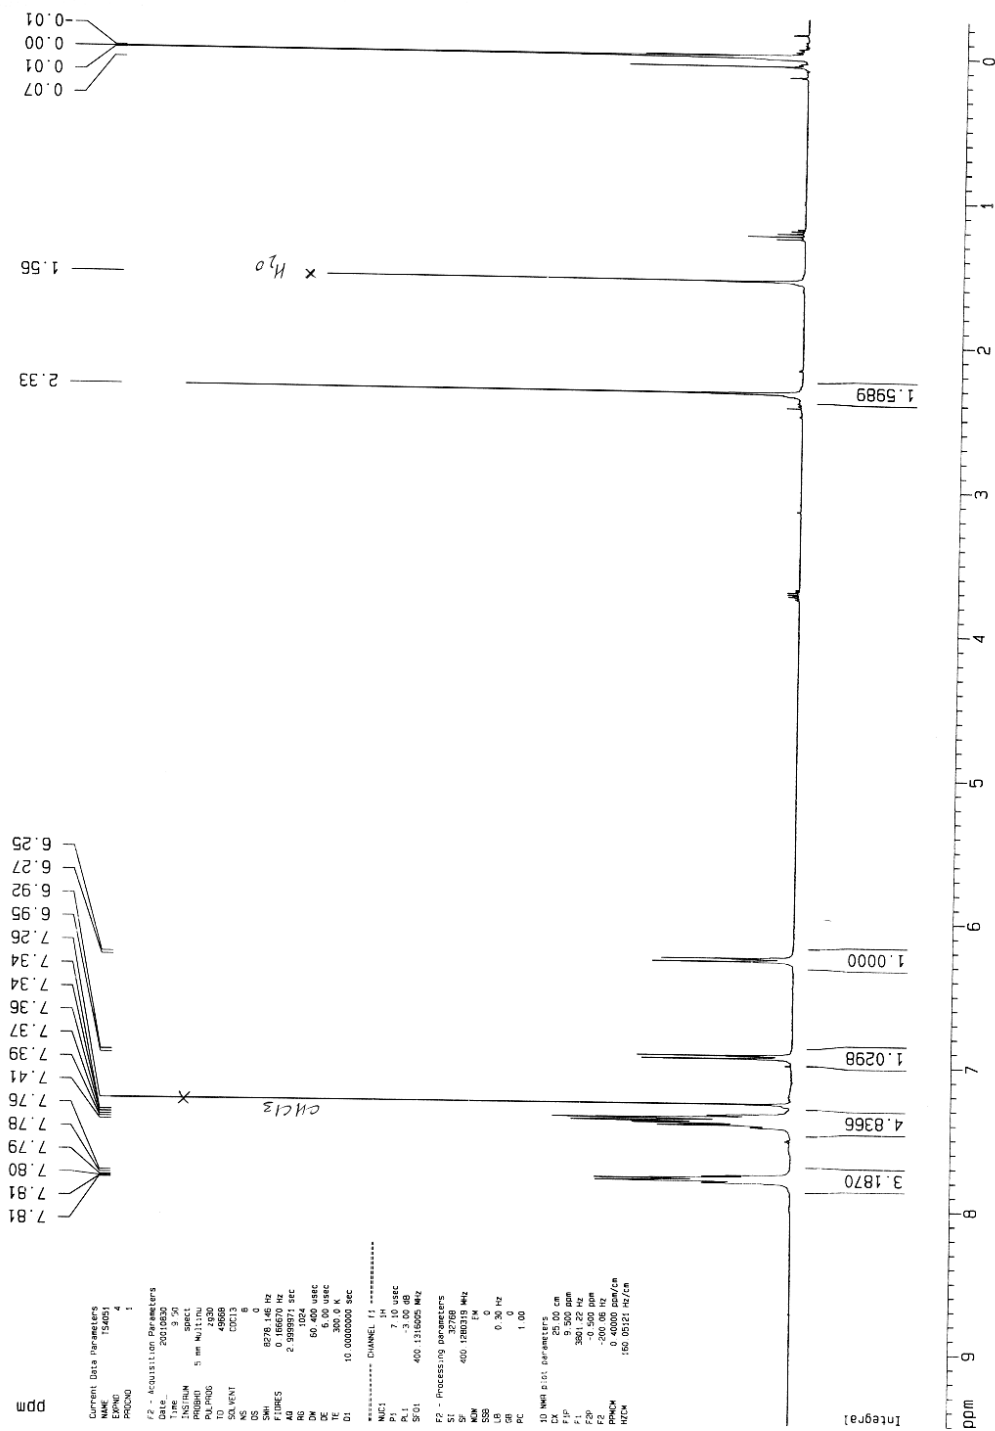

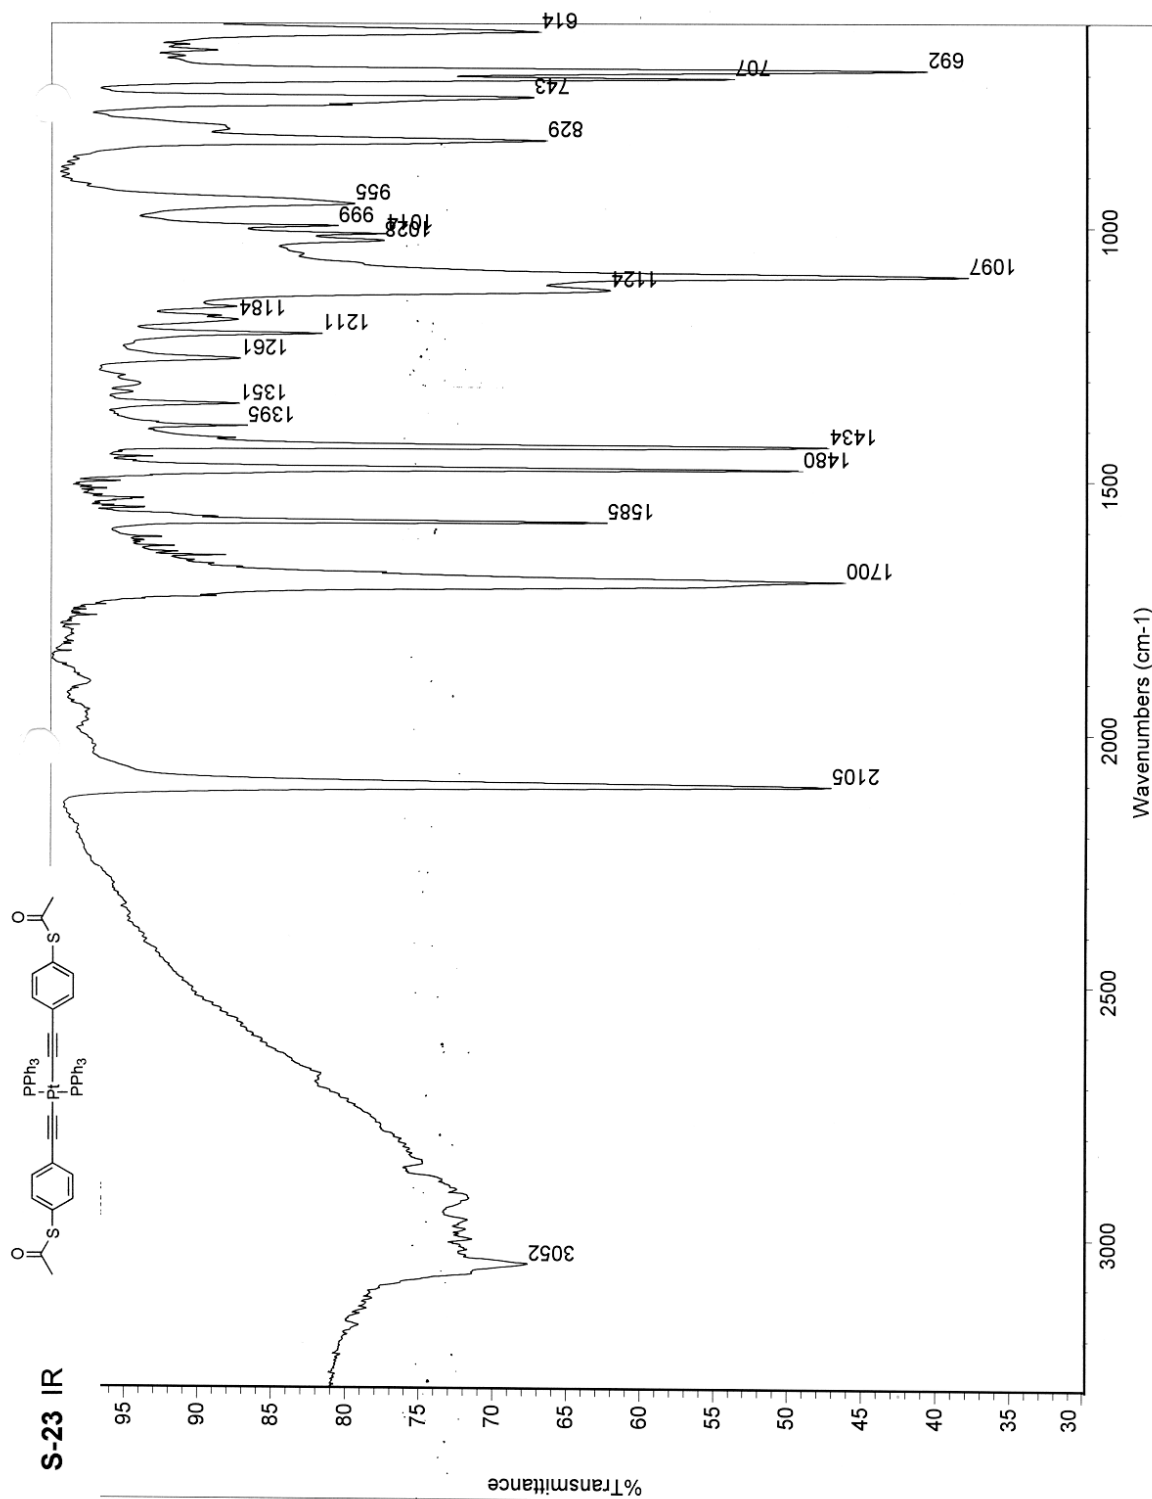

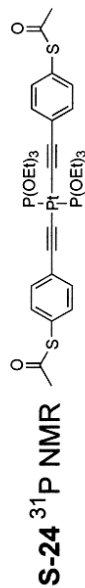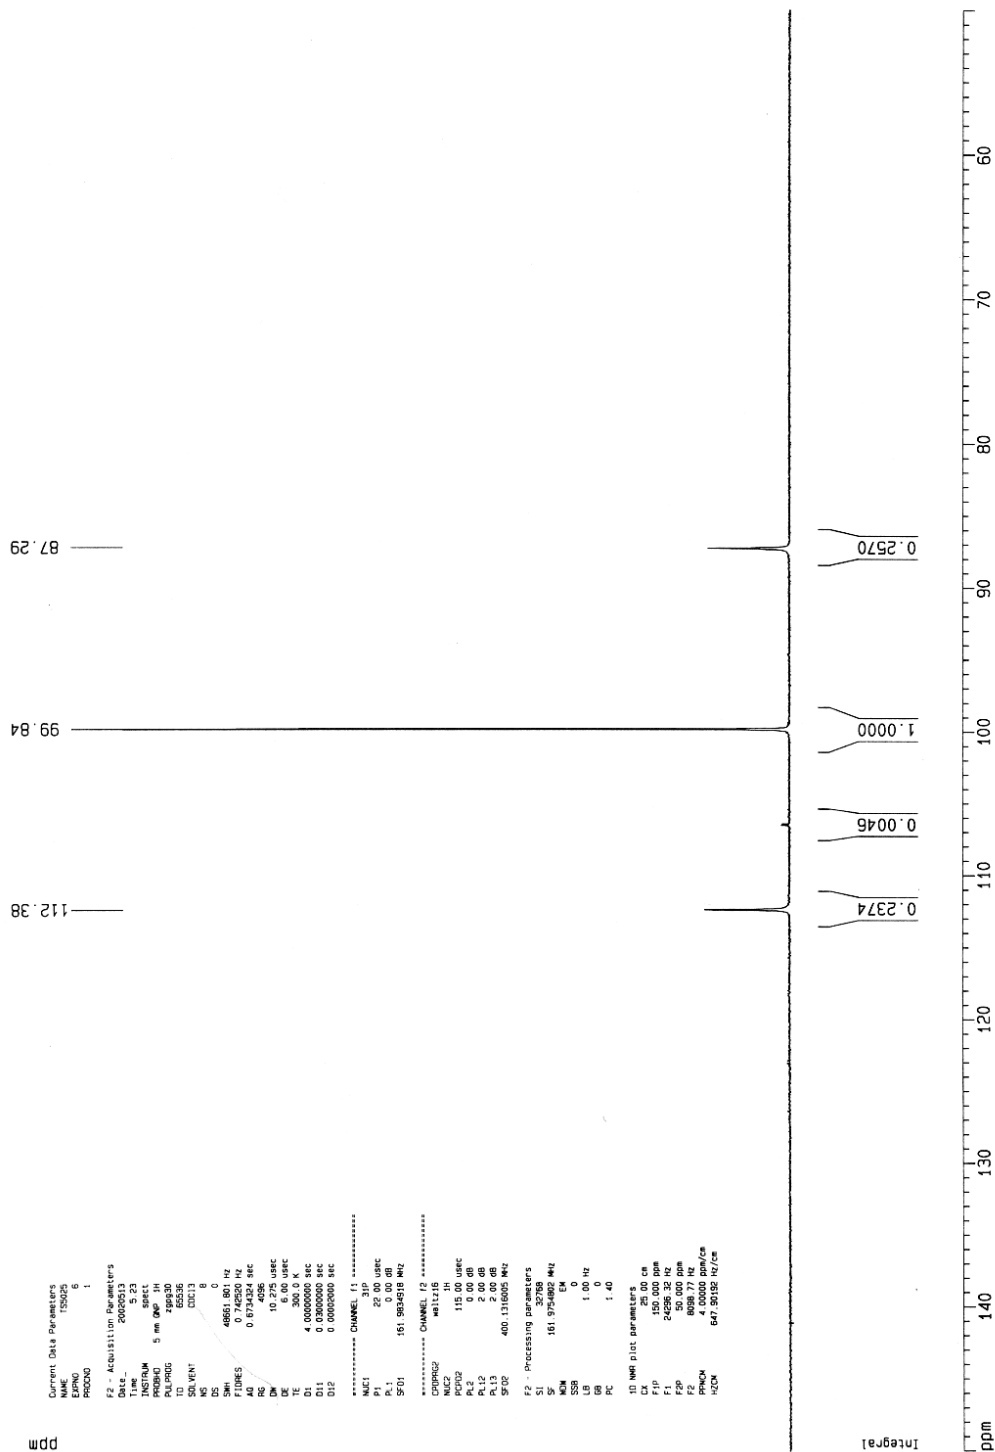

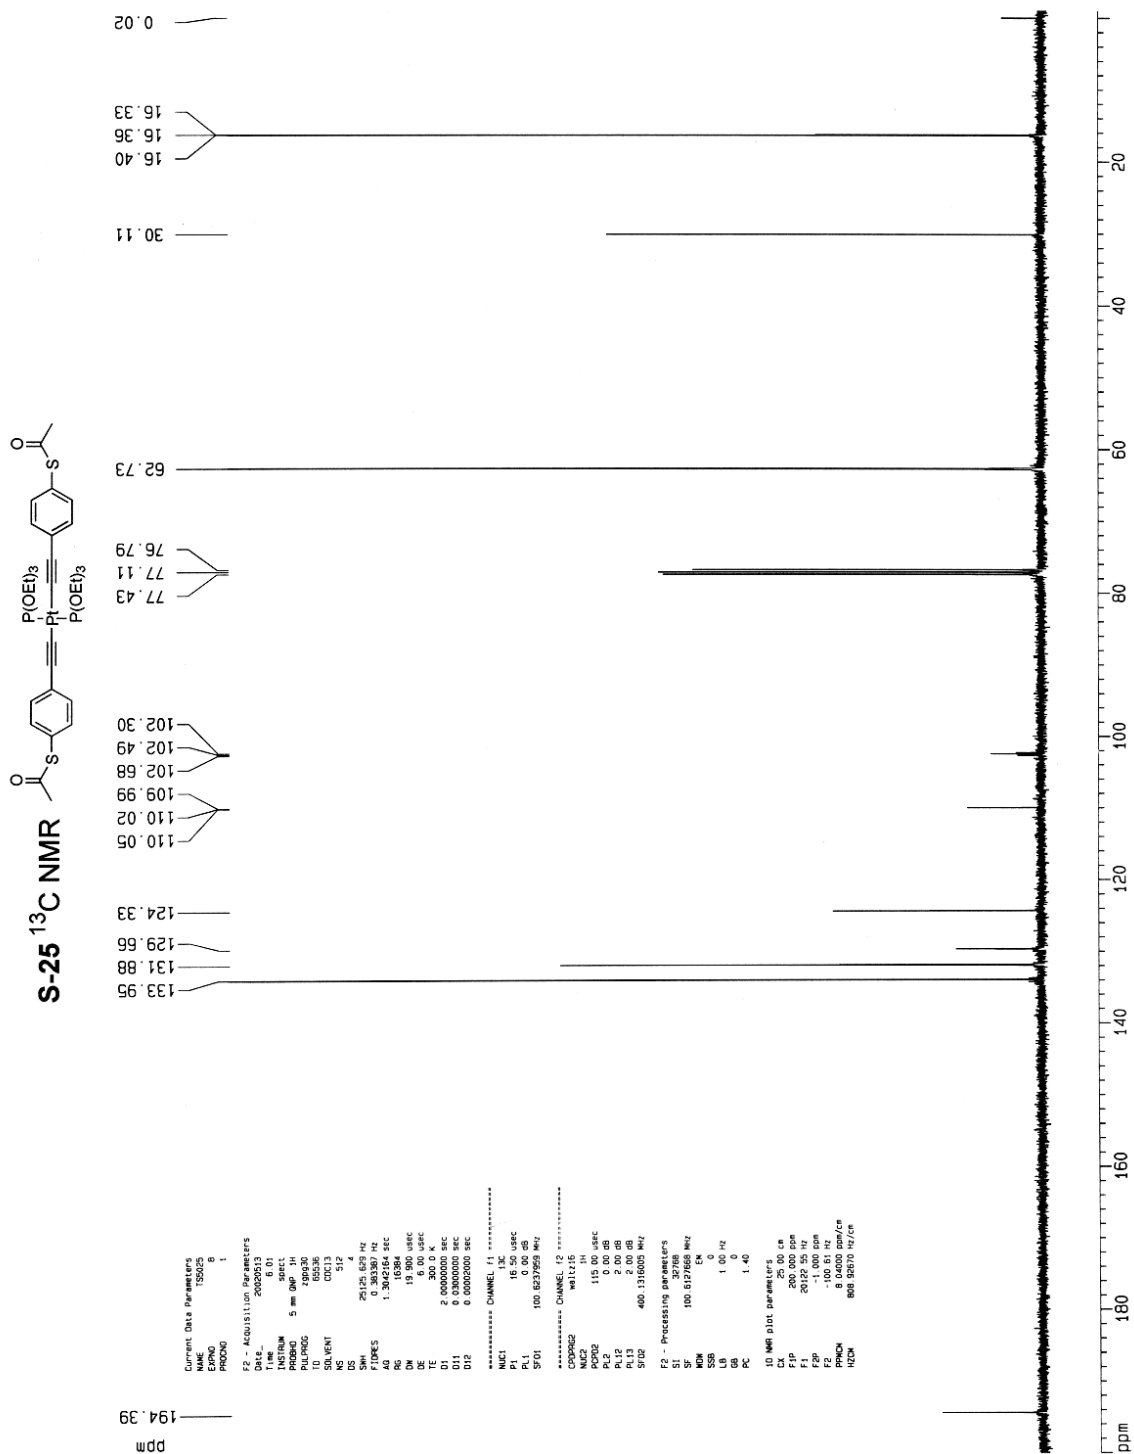

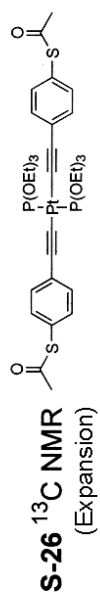

102.68  
102.49  
102.30

110.05  
110.02  
109.99

ppm

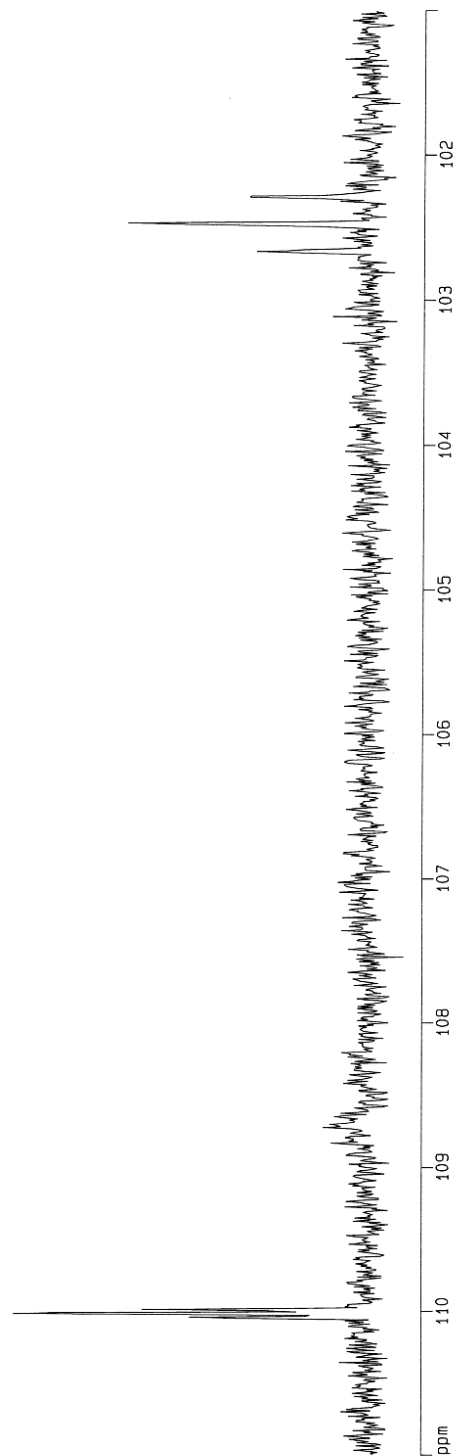

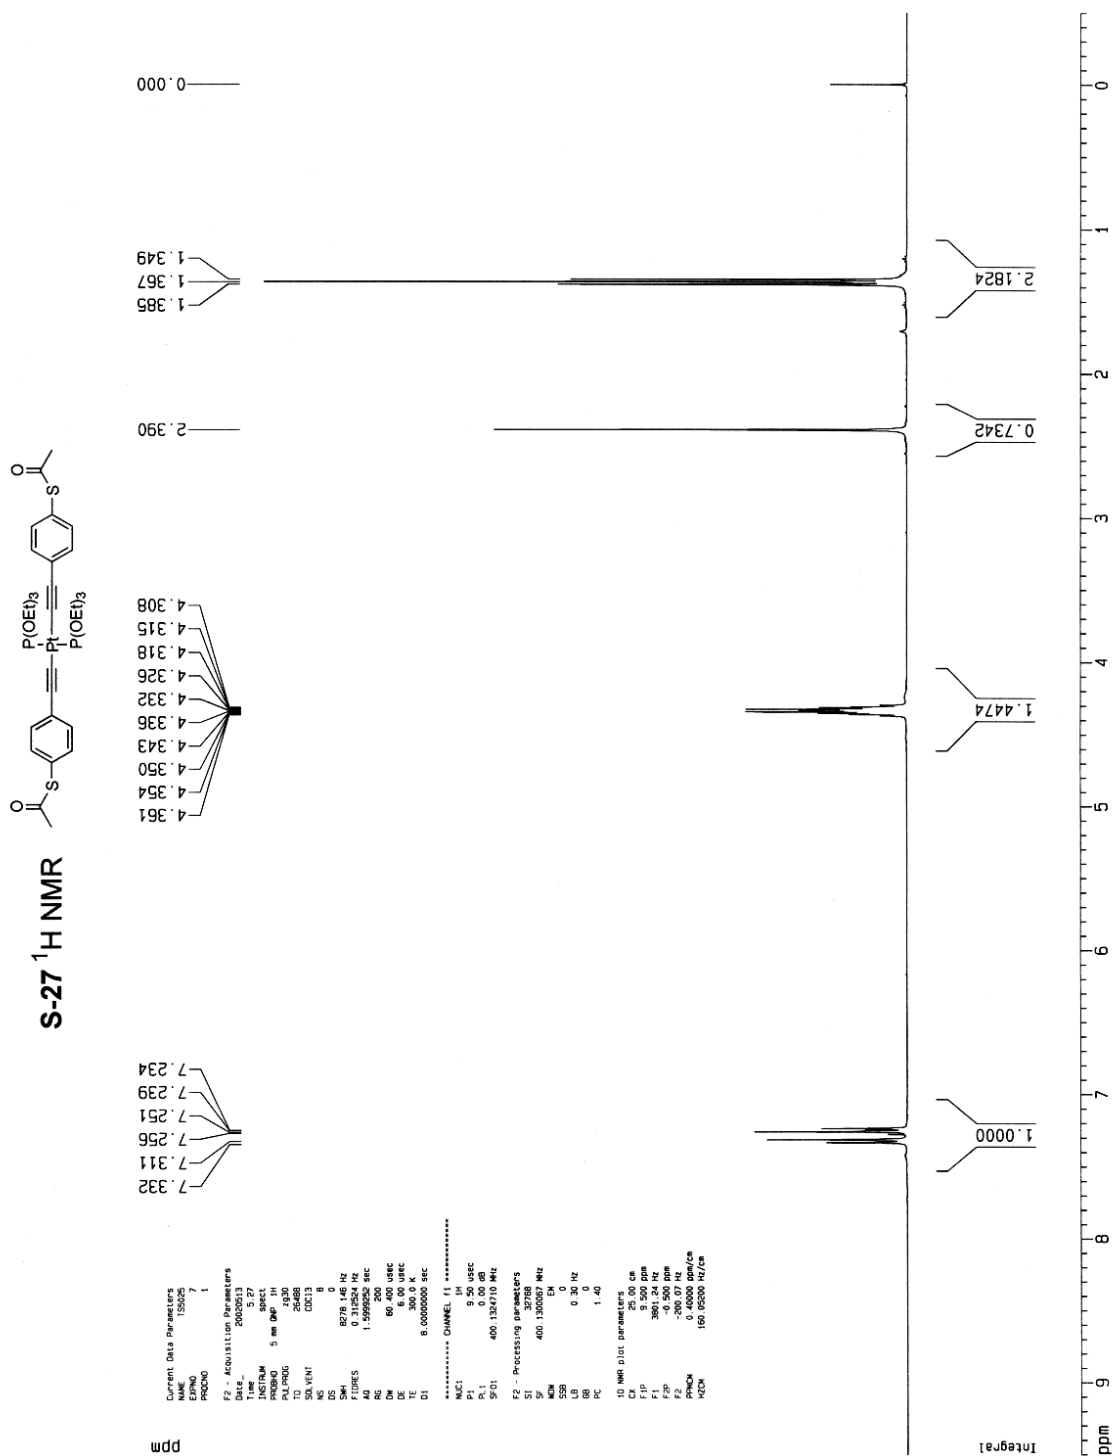

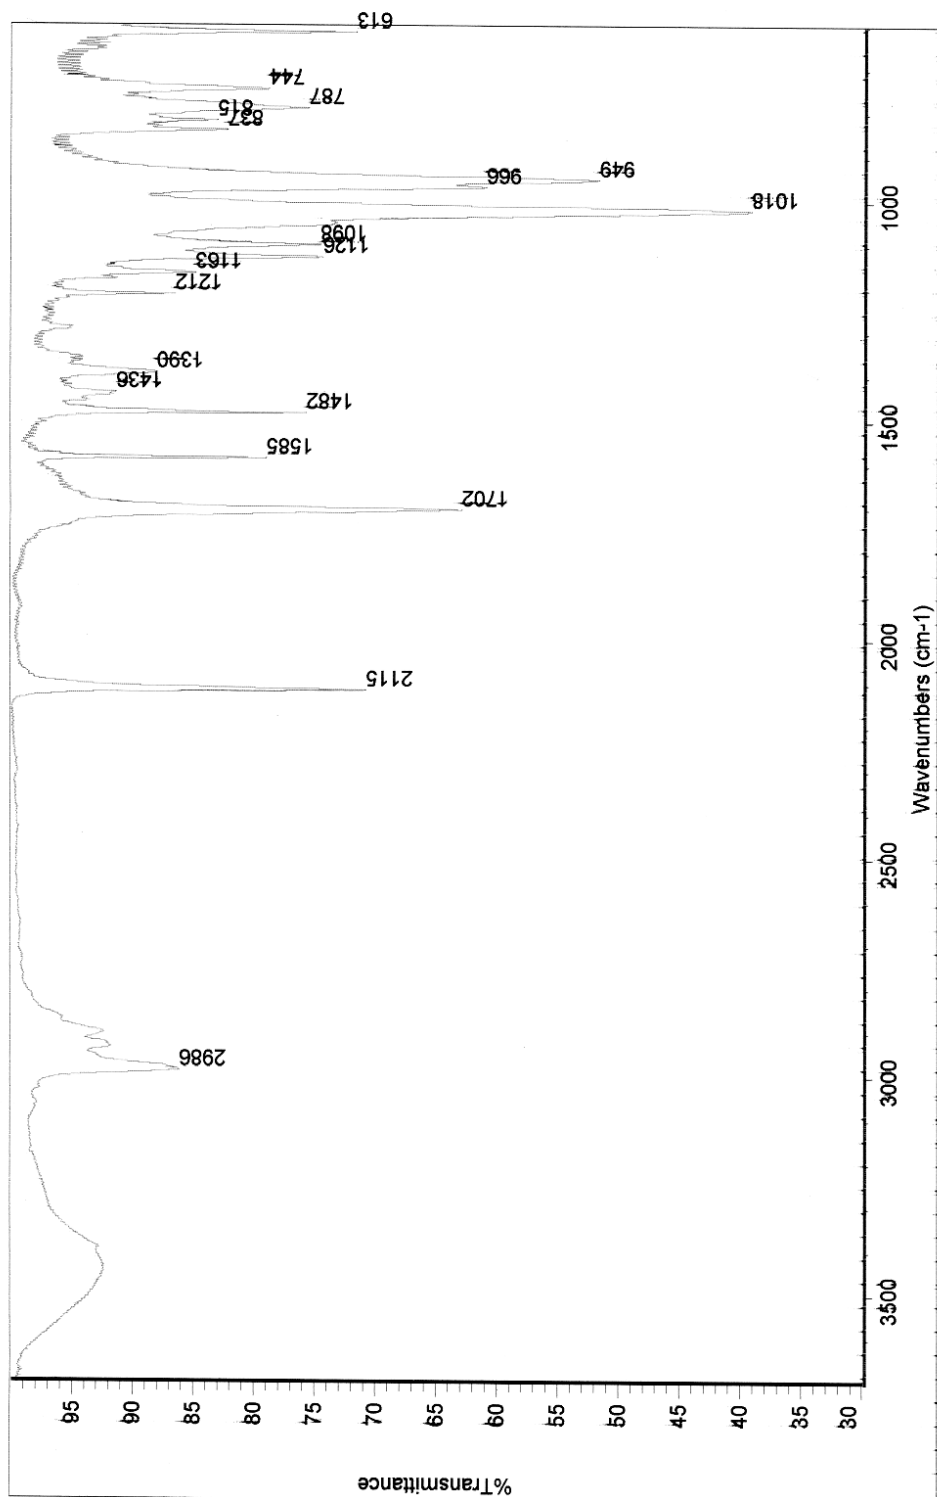

Date: Thu Oct 03 16:26:12 2002

Scans: 64

Resolution: 2.000

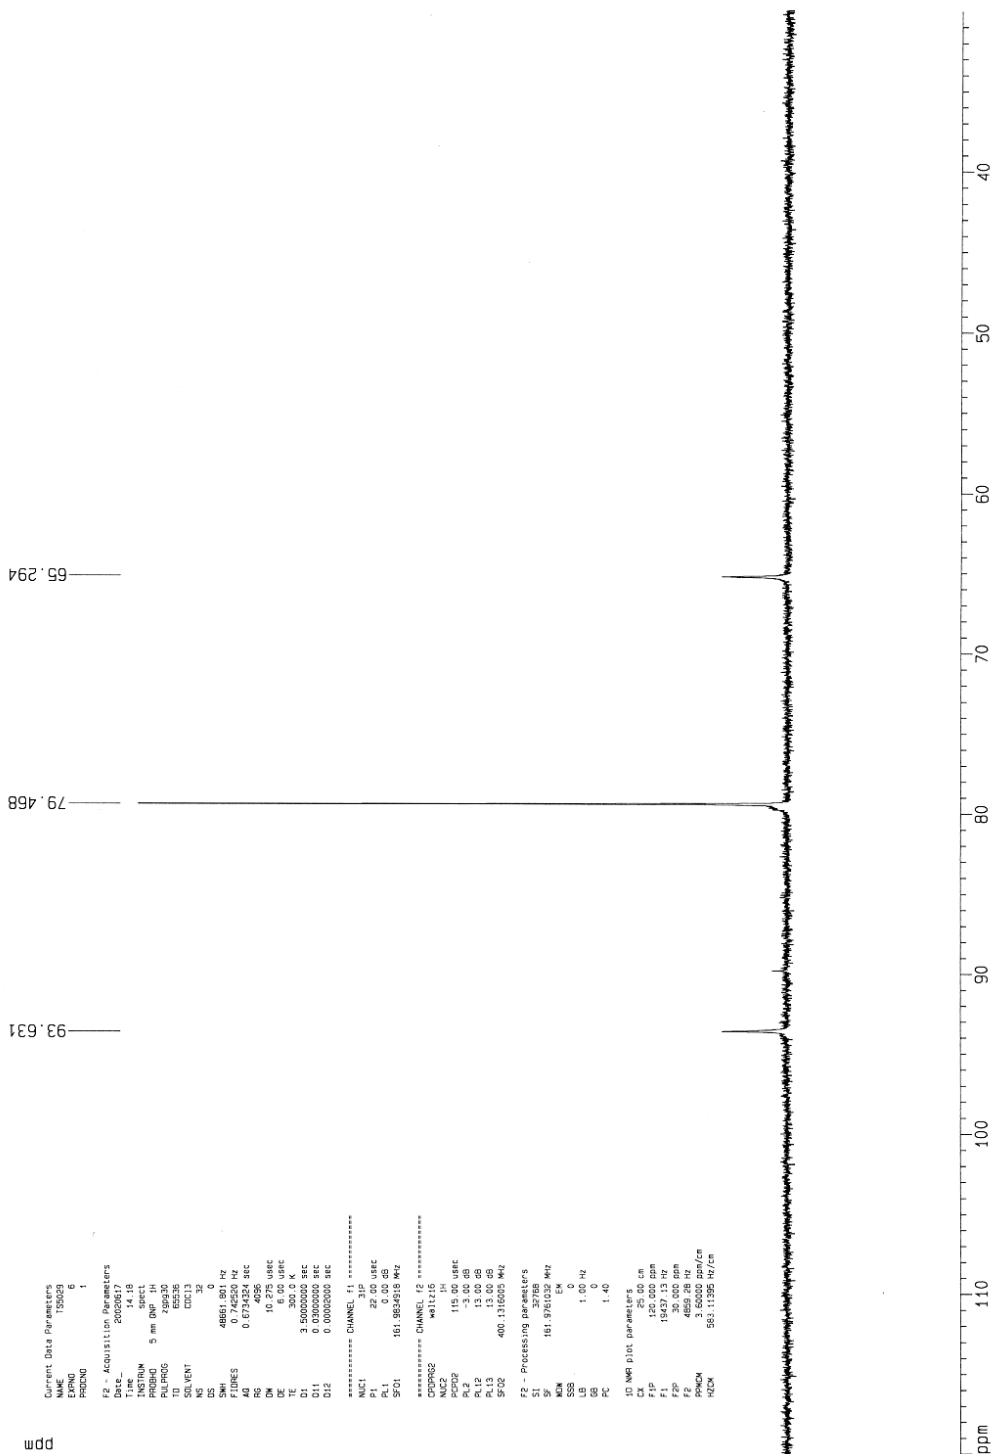

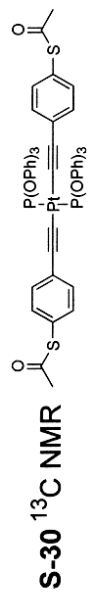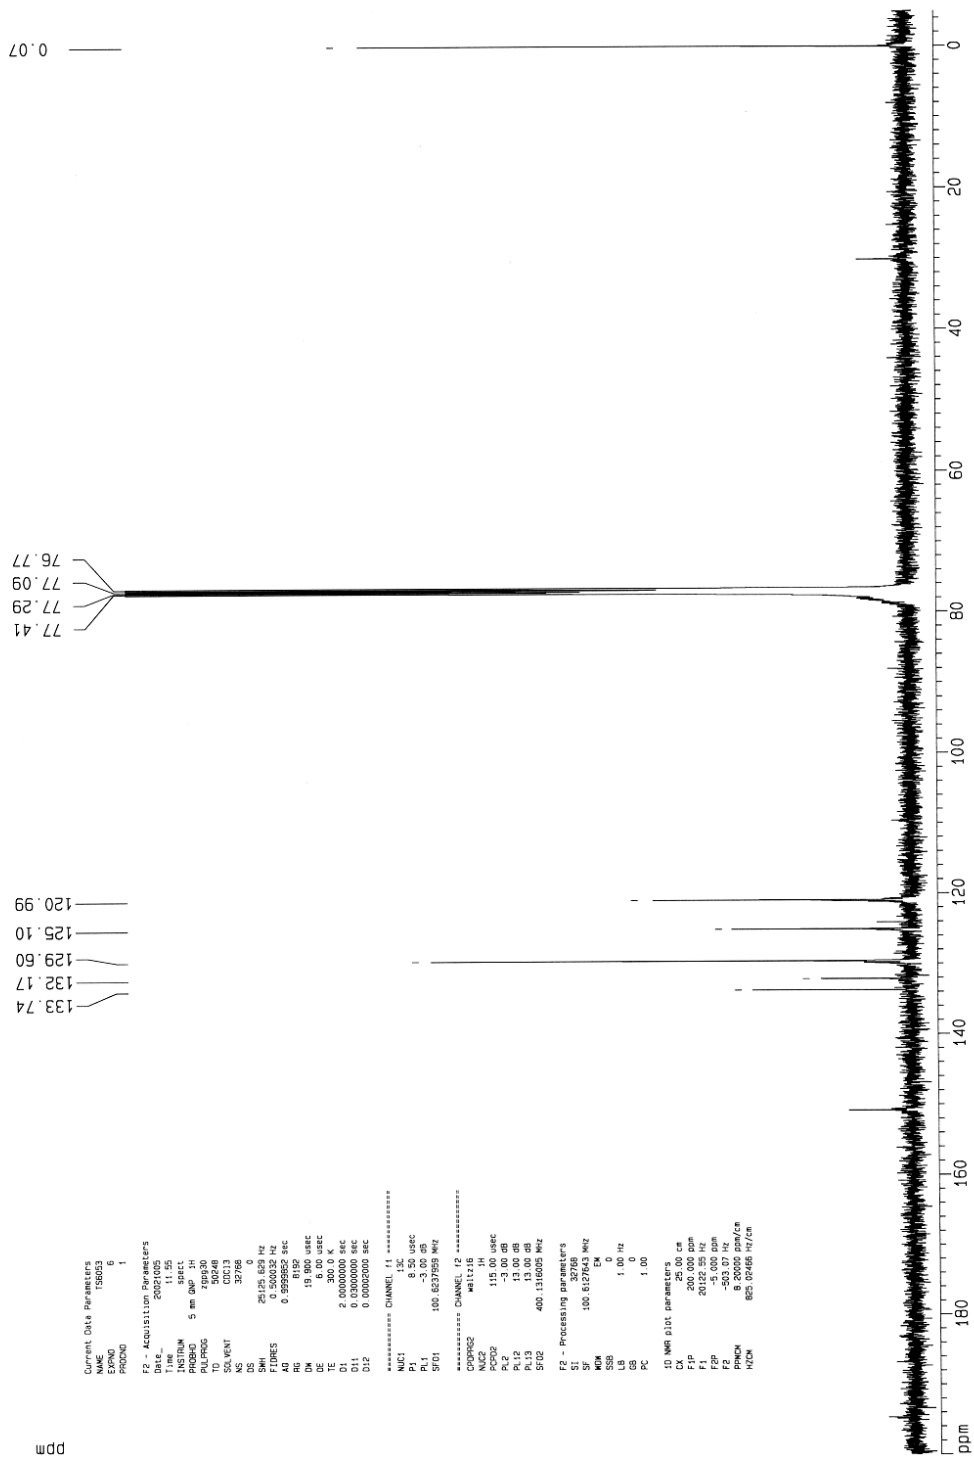

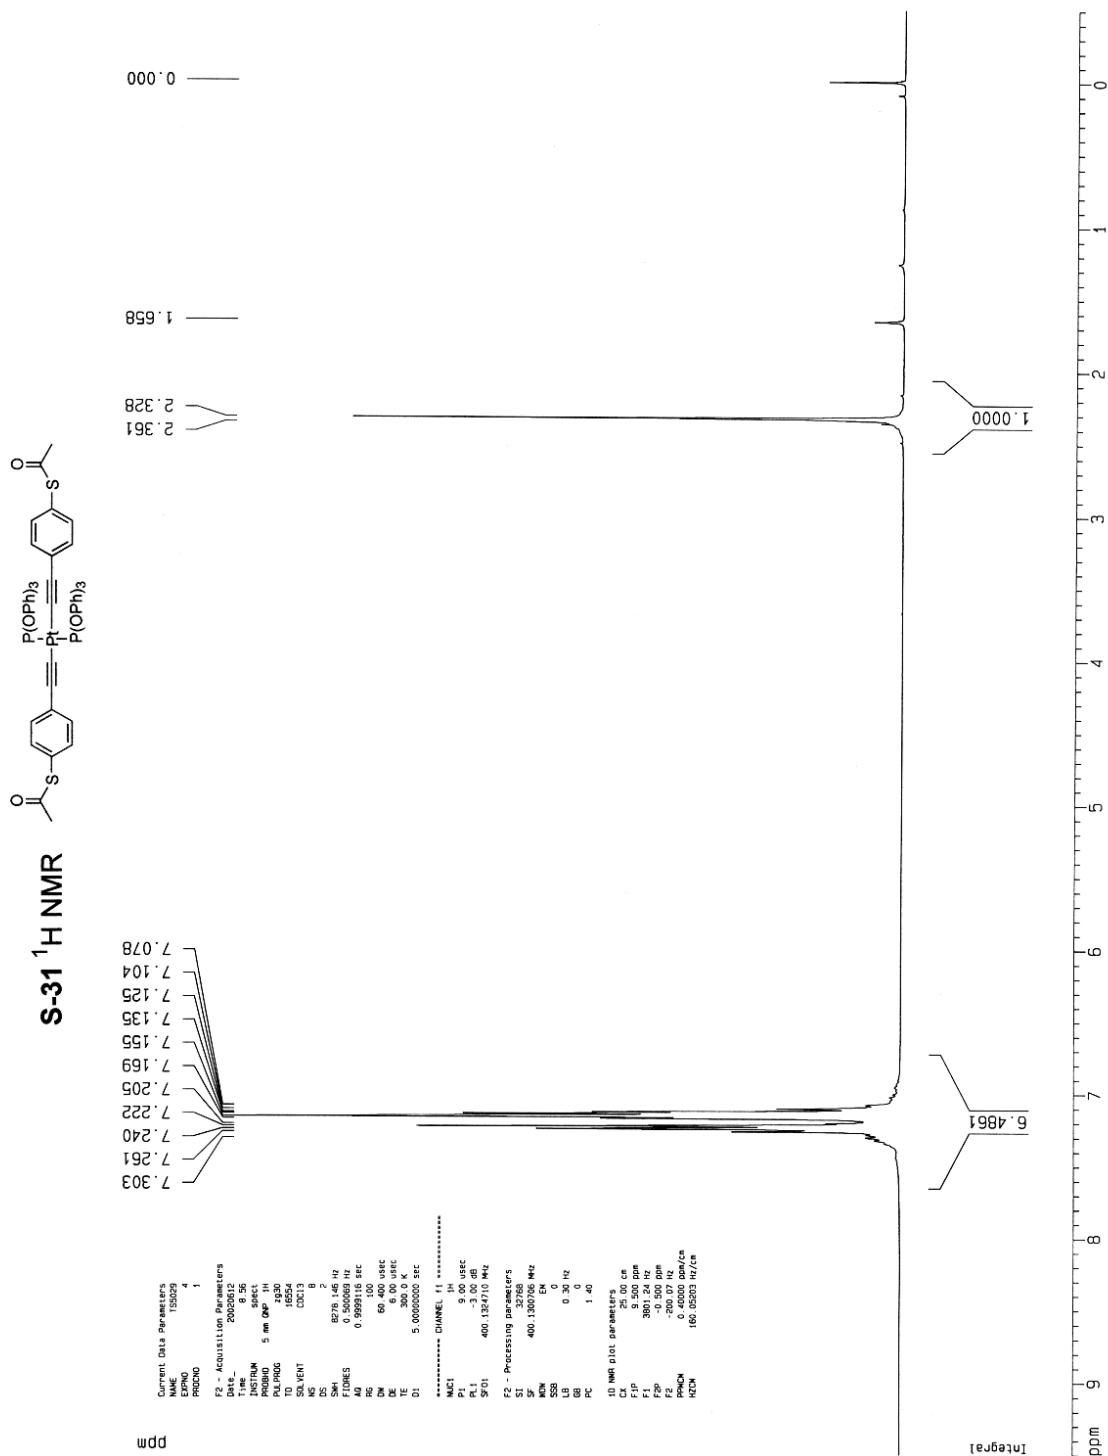

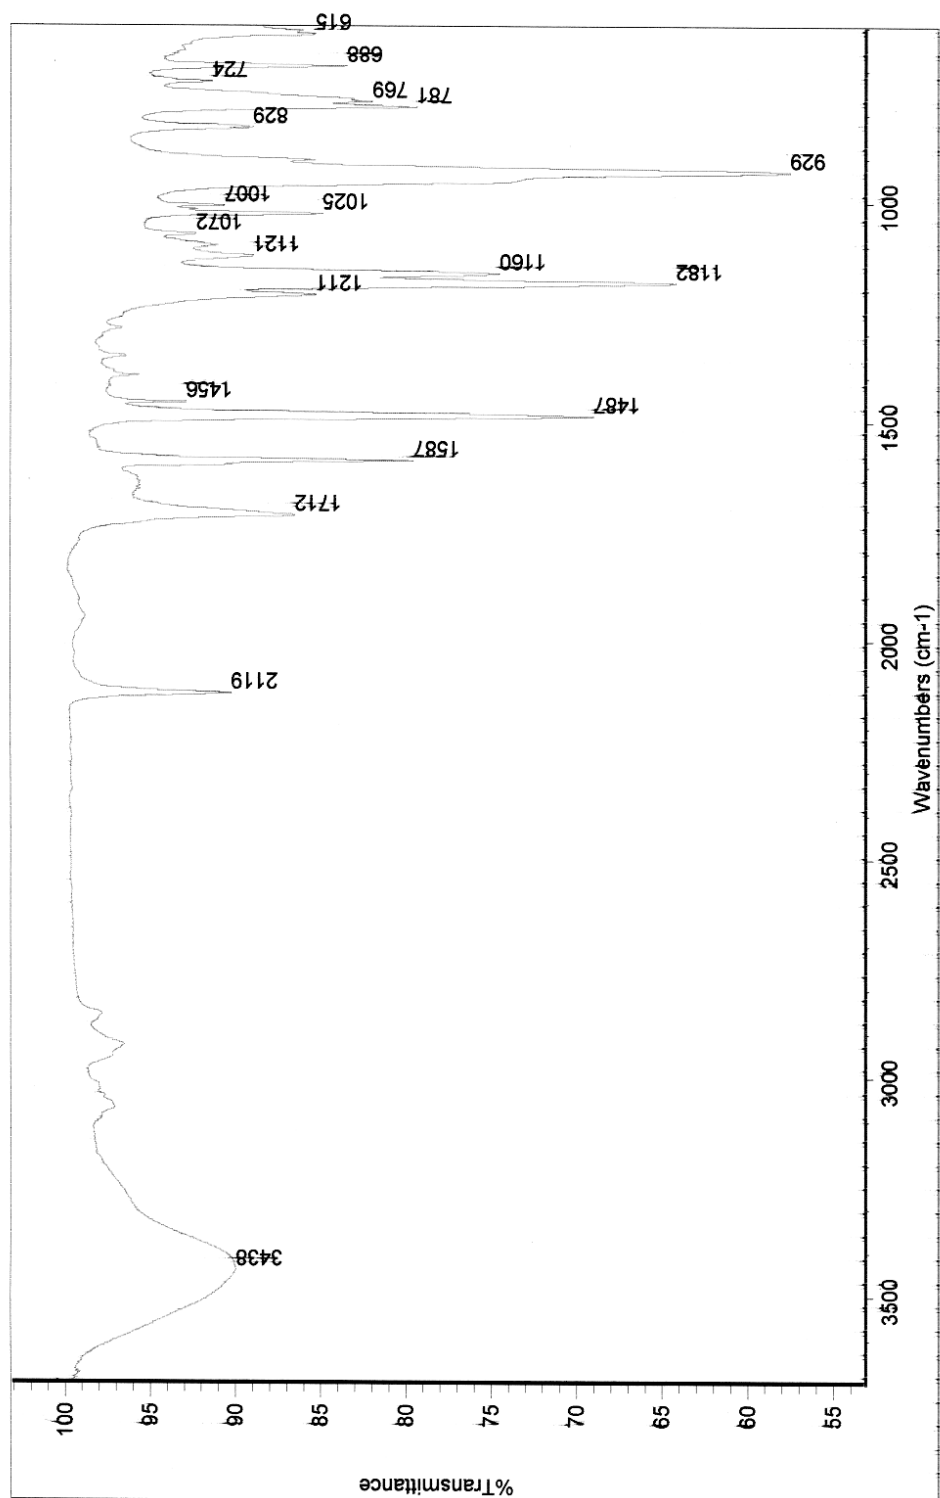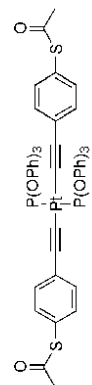

S-32 IR

Date: Thu Oct 03 18:28:08 2002

Scans: 64

Resolution: 2.000
